# Supplementary material
Source: PubMed Central journal article supplement (PMC6377236)
Supplement: NIHMS1008689-supplement-Supplemental_materials.pdf [file NIHMS1008689-supplement-Supplemental_materials.pdf]

## **Supplemental Material**

## Supplemental Methods:

**CHARGE-TSS Sample Selection.** The Cohorts for Heart and Aging Research in Genetic Epidemiology (CHARGE) Consortium is a consortium of population- and community-based cohorts designed to facilitate studies of genetic epidemiology.<sup>1</sup> The CHARGE-TSS is a case-cohort study design examining the relation of 14 phenotypic traits to genomic sequencing. Loci were identified by GWAS conducted by the CHARGE consortium and in the present targeted sequence study, CHARGE served as the discovery cohort. CHARGE-TSS included a random sample, stratified by sex, of at least 1000 Atherosclerosis Risk in Communities (ARIC) Study, 500 Cardiovascular Health Study (CHS), and 500 Framingham Heart Study (FHS) participants who were of European ancestry. In each cohort, investigators selected an additional sample of individuals from the extremes of the phenotype distribution of several cardio-metabolic traits. Two of those extreme sample groups were selected on the basis of PR or QRS intervals. For PR interval participant selection, individuals at the upper tail of the trait distribution were selected using a model employing the ECG phenotype as the independent variable and age, sex, study center, height, and body mass index as dependent variables. For QRS duration selection, individuals were likewise chosen at the upper tail of the distribution of the phenotype residuals. Individuals with a QRS interval > 120ms were excluded from selection. All residuals were created separately by gender and an even number of men and women were selected. In total, 200 participants from the extreme distributions of each the PR and QRS intervals (ARIC N=100, CHS N=50 and FHS N=50) were selected. All ECG parameter values were derived from automatic calculations on individual ECGs. Cohort participants were ineligible for case selection if they met any of the following exclusion criteria: non-white race; no available PR or QRS measurement; prevalent atrial fibrillation; history of myocardial infarction or heart failure; history of pacemaker implantation; and use of Class I or III antiarrhythmics. In total 3699 participants were used in this analysis, including individuals selected on the basis of extreme PR, QRS, or other cardio-metabolic traits and a cohort random sample.

Loci for targeted sequencing were identified by GWAS conducted by the CHARGE consortium for a number of phenotypes. The present analysis focuses on targeted sequencing of regions of the *SCN10A* gene

for PR and QRS intervals. Sequencing was performed at a single core facility (Human Genome Sequencing Center at Baylor College of Medicine, Houston, Texas). Sequencing was conducted on the SOLiD platform and read alignment by employing the BFAST algorithm.<sup>1</sup> Data were merged in order to yield a comprehensive read for each sample. Sample reads were converted into pileup data files using SAMtools.<sup>2</sup> After filtering, variants were annotated for function by ANNOVAR.<sup>3</sup>

*Replication and Haplotype Study Sample: Exome Sequencing Project*

The NHLBI Exome Sequencing Project (ESP), a parallel exome sequencing consortium, served as the replication cohort. ESP participants are of European or African ancestry and selected from cohort and case-control studies in order to examine genomic associations of heart, lung and blood disease.<sup>4</sup> Participants in ESP were categorized by extremes of quantitative phenotypes (low-density lipoprotein cholesterol, blood pressure, body mass index (BMI)) and three disease endpoints (ischemic stroke, chronic obstructive pulmonary disease and early onset myocardial infarction). In addition, the participating cohort studies contributed a large, carefully phenotyped reference group for sequencing. ESP participants were excluded from this analysis if they did not have measured PR or QRS intervals, had a history of pacemaker or defibrillator implantation, or had prevalent AF. Studies with genotyping ESP and with PR and QRS interval comprised five large US based cohorts: two biracial cohorts of European and African-descent individuals (ARIC, CHS), one cohort of predominantly African-Americans (JHS), one cohort of predominantly European-descent individuals (FHS), and one multi-ethnic cohort (Multi-Ethnic Study of Atherosclerosis (MESA)); as well as the Women's Health Initiative (WHI), a multi-ethnic US population-based study of post-menopausal women. Because ARIC, CHS, and FHS contributed to ESP, participants of European ancestry from these cohorts were excluded from the ESP association analysis described here in order to preclude participation of the same individual in both the discovery and replication cohorts. In total, our replication sample (ESP-Replication) included 607 ESP participants of European ancestry and 972 African American participants. Haplotypes were derived from all

ESP participants, including those from ARIC, CHS and FHS, thus increasing the ESP-Haplotype sample to 4,306 participants of European ancestry and 972 African American participants.

Whole exome sequencing was performed at two genome centers using Illumina GAI or HiSeq2000 sequencers. All samples were jointly processed for variant detection and quality control. Sequencing and quality control of the ESP exomes has been described in detail elsewhere.<sup>5,6</sup>

#### *Extension Study Sample: CHARGE Exome chip cohorts*

To increase the sample size, we examined genotype data from the entire ARIC, CHS and FHS cohorts. CHARGE cohort studies were genotyped using the Illumina HumanExome v1.0 array. Genotypes from the CHARGE cohorts were jointly called and underwent extensive quality control at the University of Texas Health Science Center at Houston.<sup>7</sup> Cohort participants were excluded from analyses using the same criteria as the sequence analyses: non-white race; no available PR or QRS measurement; prevalent atrial fibrillation; history of myocardial infarction or heart failure; history of pacemaker implantation; and use of Class I or III antiarrhythmics. Participants with a QRS interval >120ms were excluded from the QRS interval analyses. A total of 20,666 European ancestry participants (CHARGE-Exome sample) were analyzed.

#### **Statistical analysis of common and rare variants**

We categorized allelic variation into two classes: rare (< 1.0% minor allele frequency [MAF]) or common ( $\geq 1\%$  MAF). Common variants were examined individually using linear regression except in FHS, where a linear mixed effect models was used to account for familial structure. Analyses for both PR and QRS intervals were adjusted for age, sex, height, BMI, and study-specific population variables. In order to obtain unbiased population effect estimates in the discovery cohorts, analyses weighted by the sampling probabilities were also conducted. We performed fixed-effect inverse variance weighted meta-analysis of study-specific association results to combine results. For our most significant gene-wide signal, we used a conservative significance threshold of  $p < 5 \times 10^{-6}$ . For missense variant analyses, we used a Bonferroni correction for the number of tests (2 phenotypes, PR, QRS, and 7 SNPs),  $0.05/14$ . Secondly, we ran multivariable analyses in

ESP for each of the seven missense *SCN10A* variants adjusting for all common missense variants in the adjacent sodium channel genes, *SCN5A* (rs1805124) and *SCN11A* (rs72869687, rs33985936, rs13059805) to determine independence of signal.

Rare variation in the region was jointly analyzed using the Sequence Kernel Association Test (SKAT), which was adapted for a meta-analysis framework.<sup>8,9</sup> Each study provided single variant z-statistics from score tests as well as genotype covariance matrices. The score statistics were meta-analyzed and combined into a weighted sum, where the weights upweight variants with lower MAFs. The non-standard sampling distribution for the test statistic is estimated using the eigenvalues of a sample-size weighted average of the per-study genotype covariance matrices. For replication of the rare variant test in ESP, the SKAT software provided by the authors of the method was used.<sup>9</sup> All SKAT tests were likewise adjusted for age, sex, height, BMI and study specific population variables. All analyses were performed by the R software packages ([www.r-project.org/](http://www.r-project.org/)).

### **Haplotype Analysis**

Genotypes of both European and African descent populations from ESP were phased separately by race using PHASE.<sup>10</sup> PHASE estimates of haplotype frequency were reported. Since each individual is diploid, two best estimated haplotypes are reported for each participant. Mean PR intervals per haplotype were estimated by averaging the PR values for each person with the haplotype. Individuals that were homozygous for a haplotype would contribute a PR value for each of their haplotypes.

Haplotype association testing was performed with HAPSTAT using an additive model, which implies that having two copies of a causal haplotype has twice the effect on PR as compared to having a single copy. The wild-type (WT) haplotype was used as the reference group.<sup>11,12</sup> The same exclusions and adjustments as used in the single SNP genotype association testing were applied. Individuals of both races are included in the association analyses and the analyses were adjusted for race.

### **Methods for Gene Expression Analysis**

We performed an expression quantitative trait loci (eQTL) analysis using the most significant 5 SNPs at the *SCN10A* locus associated with PR or QRS intervals in this study or in prior GWAS efforts of PR or QRS intervals (rs10428132, rs6795970, rs6801957, rs6800541, rs6599250). Given that these variants are in high linkage disequilibrium (LD), we used a p-value threshold of 0.05 to assess significance. We examined eQTL associations from three sources: Cleveland Clinic study (left atrial appendage), University of Pennsylvania study (right and left atrium and left ventricle),<sup>13</sup> and Massachusetts General Hospital (left atrial appendage). Through publically available eQTL datasets, we secondarily examined eQTL for a variety of other tissue types, many of which are not known to express either *SCN5A* or *SCN10A*.

#### *Cleveland Clinic study*

In the Cleveland Clinic study, human left atrial appendage tissue was obtained with consent from 230 European-American patients undergoing cardiac surgery. Use of discarded surgical tissue was approved by the Institutional Review Board of the Cleveland Clinic. Total RNA was extracted using Trizol. Genome-wide RNA levels were measured using Illumina HT12 v.3 microarrays. RNA expression levels were background corrected, log<sub>2</sub>-transformed, quantile-normalized and batch adjusted. These subjects were genotyped using Illumina Hap550 and Hap650 arrays.

#### *University of Pennsylvania*

In the Penn study, right (n=52) and left atrial tissue (n=53) was obtained with consent from subjects undergoing heart transplantation or from unused organ donors. Cold cardioplegia was used prior to cardiac explantation and the lateral walls of the atria were dissection and frozen. Total RNA was extracted using Trizol and Genome-wide RNA levels were measured using Affymetrix HU 133A arrays. Genotypes were

obtained from Affymetrix 6.0 platform and all subjects were genetic European Americans by MDS analysis of genotypes. Data were processed and analyzed as described above for the Cleveland Clinic samples.

Samples of cardiac tissue were acquired from individuals in the Myocardial Applied Genomics Network. Left ventricular free-wall tissue was collected at the time of cardiac surgery from subjects with heart failure undergoing transplantation or from unused donor hearts. DNA samples were genotyped using the Affymetrix 6.0 genome-wide array, and RNA expression was measured using the Affymetrix Genechip ST1.2 array. Imputation to SNP genotypes in the 1000 Genomes Project was performed. Analyses were restricted to 313 samples with genetically inferred European ancestry. SNP genotype was tested for association with log<sub>2</sub>-transformed expression levels, after adjustment for age, sex, study site, disease status and batch.

#### *Massachusetts General Hospital*

A total of 121 human left atrial samples (LA) were obtained during cardiac surgery for valvular heart disease (n=83) or cardiac transplantation (n=27) at Massachusetts General Hospital (MGH). Normal LA tissue was also obtained from the National Disease Research Interchange repository (n=11). The sample collection was approved by the Institutional Review Board at Massachusetts General Hospital.

For DNA extraction, the tissues were digested in 200ul DirectPCR solution (VIAGEN Biotech Inc, Los Angeles, CA) containing about 80 ug of Proteinase K followed by phenol: chloroform: isoamyl alcohol extraction and ethanol precipitation. Genotype at rs6800541 was determined using custom designed TaqMan probe (Life Technologies, Carlsbad, CA). DNA amplification and genotype analysis was done using iTaq Universal Probes Supermix (Bio-Rad) on CFX384 Real-Time System.

For RNA extraction, the tissues were homogenized in 1 ml of TRIZOL<sup>®</sup> Reagent (Life Technologies, Carlsbad, CA). After addition of chloroform and centrifugation aqueous phase was then collected, and mixed with an equal amount of 100% ethanol and purified on the RNeasy column according manufacturer's instructions. The reverse transcription reaction was performed using iScript kit (Bio-Rad Laboratories,

Hercules, CA) according to manufacturer's instructions. We then performed qPCR using iTaq SYBR-green reagent (Bio-Rad) on CFX384 Real-Time System. Primer pairs were validated with standard curve and single peak on the melting curve, primer efficiency assessed with serial dilutions of the sample. Conditions for qPCR were 50°C for 2 min, 95°C for 10 min, 95°C for 15 sec, 60°C for 1 min (last two steps was repeated for 40 times) followed by the melting curve assessment. Cq values were exported and relative expression compared to the housekeeping genes, TBP and HPRT, was calculated. The primer sequences are listed in **Supplemental Table 5**.

### **Human *SCN10A* clone, mutagenesis and expression**

The human *SCN10A* alpha subunit cDNA built-in a pCMV6-XL5 vector was purchased from OriGene. The *SCN10A* DII-DIII linker variants/haplotypes (IV, PT, VA, LP, VA+LP, IV+VA and IV+VA+LP) were generated using the QuikChange lightning (Agilent) PCR mutagenesis kit using appropriately designed mutagenic primers. *SCN10A* wild type and variant/haplotype cDNA clones were validated by sequencing. The *SCN10A* constructs were expressed in a Neuroblastoma 2a (N2a) cell line derived from mouse (ATCC, catalog number CCL-131). N2a cells were used because these neuronal cells expressed functional ion channels when transfected with *SCN10A* constructs. The N2a cells were maintained in Eagle's Minimum Essential Medium with 10% fetal bovine serum (ATCC) and 5% penicillin/streptomycin at 37°C with 5% CO<sub>2</sub> and 95% O<sub>2</sub>. The N2a cells were seeded on cover slips in 35mm culture dishes and transiently transfected with 1 µg *SCN10A* (wild type or variant) and 0.6 µg GFP using Fugene 6 (Promega) according to manufacturer instructions. GFP positive cells were identified 48 hours after transfection and were used for electrophysiology studies.

### **Patch Clamp Electrophysiology and Data Analysis**

Wild type and variant/haplotype Nav1.8 currents were measured using the whole-cell patch clamp recording technique at room temperature. Borosilicate patch pipettes were pulled using P1000 (Sutter) with tip resistances ranging from 2-4 MΩ when filled with internal solution containing (in mM), 130 CsCl, 10 NaCl, 1 CaCl<sub>2</sub>, 1 MgCl<sub>2</sub>, 10 HEPES, 11 EGTA, 5 MgATP adjusted to pH 7.2 with CsOH. The N2a cells were continuously



perfused with an external solution containing (in mM), 130 NaCl, 5 CsCl, 2 CaCl<sub>2</sub>, 1.2 MgCl<sub>2</sub>, 10 HEPES, 5 glucose and adjusted to pH 7.4 with CsOH. Tetrodotoxin (TTX, 150 nM) was used to block endogenous sodium currents. In non-transfected N2a cells, the above solutions with TTX abolished all endogenous currents. In the whole cell configuration, TTX was perfused onto cells for four minutes and recordings were made after 5 minutes. The current recordings were acquired with the Axopatch 200B amplifier and filtered at 5 kHz using online P/4 protocol to subtract linear leak along with 80% series resistance and whole-cell capacitance compensation. Data were acquired and analyzed using pClamp9 and SigmaPlot 12.

The steady-state voltage dependent activation curves were determined from a holding potential of -100 mV and stepping to a range of depolarizing pulses from -70 mV to +60 mV for 50 ms in 10 mV increments. Conductance-voltage relationships were plotted using the peak current with the equation:  $G_{Na} = I_{Na}/(V-E_{Na})$ , and then fitted with a Boltzmann equation ( $G_{Na}/G_{Na_{max}} = \text{min} + \text{max}/(1 + \exp(-(V-V_{1/2})/k))$ ). Steady-state inactivation curves were determined from a holding current of -100 mV, stepping to a range of depolarizing pre-pulses from -100 mV to -10 mV for 500 ms and then using a single test pulse at +20 mV for 50 ms to measure current availability. Currents elicited were normalized to maximum peak current at -100 mV and fit with a Boltzmann equation. The late sodium current was determined from a holding current of -100 mV and then pulsing to +20 mV for 475 ms. The percent late sodium current was measured by dividing the steady-state inactivated current at the end of the 475 ms pulse by the peak current at +20 mV. Recovery from inactivation was determined by an initial test pulse to +20 mV for 475 ms, then stepping to -100 mV for a variable duration ranging from 0.5 ms to 1 s followed by a final test pulse to +20 mV. The recovery from inactivation was fit with a double exponential. Open state inactivation was determined for voltages from -10 mV to +40 mV by fitting the currents with a single exponential. The data are presented as mean  $\pm$  s.e. and a student's t-test was used to determine a significant difference ( $P < 0.05$ ).

### **Immunohistochemistry**

Explanted human hearts that were not used for transplant were obtained from Lifeline of Ohio in accordance with The Ohio State University Institutional Review Board, as published previously.<sup>14</sup> Explanted

hearts were cardioplegically arrested and cooled to 4°C from the time of aortic cross-clamp in the operating room and during transport and dissection. Right atrial tissue was isolated and then flash frozen in Optimal Cutting Temperature (OCT) media, and stored at -80°C until use. Tissue from three different specimens were used in this study: 921821, 394176, and 219852.

Samples were cryosectioned and Masson trichrome staining was performed (Sigma) for morphology and localization. Adjacent sections were selected, thawed to room temperature, and fixed in 4% paraformaldehyde for 5 minutes. Sections were then washed in PBS 3 times for 5 minutes each. Following fixation, sections were permeabilized with 0.1% Triton X-100 for 15 minutes, washed 3 times with PBS for 5 minutes each, then blocked with 10% normal goat serum for 30 minutes. Tissue sections were then incubated with the primary antibody overnight at 4°C (anti-Nav 1.8, Abcam AB66743, at a concentration of 1:200 and anti-Cx43, Invitrogen 35-5000, concentration 1:200). The following morning, the samples were washed with PBS 3 times for 5 minutes each, then incubated with the secondary antibody (anti-rabbit AlexaFluor 546 1:500 and anti-mouse AlexaFluor 488 1:500), for 2 hours at room temperature while protected from light, followed by 5 PBS washes for 5 minutes each, then mounted with Vectashield mounting medium containing DAPI.

### **Immunocytochemistry**

To verify the SCN 10A antibody efficacy and specificity for SCN 10A over SCN 5A, N2A cells were co-transfected with GFP and either the WT SCN10A construct or SCN 5A constructs as described above. After 48 hours of incubation, coverslips of transfected N2A cells were fixed in 4% formaldehyde for 15 minutes and then washed twice in PBS. The coverslips were then blocked with 5% nonfat dry milk in 0.1% Triton X-100 for 2 hours at room temperature on a rotator. Coverslips were then washed twice with PBS and incubated overnight with the primary antibody (anti-Nav 1.8, Abcam AB 66743, concentration 1:200, or anti-Nav1.5, Alomone ASC-005, 1:200) in PBS with 1% bovine serum albumin. The following day, coverslips were washed with PBS 3 times, then incubated with secondary antibody (anti-rabbit AlexaFluor 546 1:500) for 1.5 hours at

room temperature, followed by two washes of PBS with 0.2% Tween, and then washed with PBS twice. Coverslips were then mounted slides with DAPI Pro-Gold Anti-Fade medium (Molecular Probes).

## Supplemental Results for Gene Expression Analyses

**Atrial tissue:** We examined atrial eQTL associations from three sources: Cleveland Clinic study, University of Pennsylvania study,<sup>2</sup> and Massachusetts General Hospital (**Supplemental Table 5**). In the Cleveland Clinic study, we found no association between *SCN5A* mRNA expression and rs6800541 genotype in the left atrial appendage samples from 230 individuals ( $p=0.74$ , **Figure S2**). Findings were similar for the other SNPs examined, rs10428132, rs6795970, and rs6801957, which are all in high LD with rs6800541. *SCN10A* was not reliably detectable due to low expression. On the basis of both Illumina HT12 microarray analysis and RNAseq, *SCN10A* mRNA is much less abundant than that of *SCN5A* in human left atrial appendage samples from Cleveland. Median ( $\log_2$ scale) abundance of *SCN10A* was -0.40, while that of *SCN5A* was 4.41, as detected with the Illumina\_1694956 probe. Similarly, there was  $\sim 1000\times$  greater abundance of *SCN5A* than *SCN10A* using RNAseq. In the University of Pennsylvania study, we found no evidence of an association between *SCN5A* mRNA expression and rs6800541 genotype in right ( $n=52$ ) or left ( $n=53$ ) atrial tissue samples ( $p>0.05$  for both).<sup>2</sup> In the MGH study, we found no association between rs6800541 genotype and *SCN5A* ( $p=0.71$ ) or *SCN10A* ( $p=0.14$ ) expression in left atrial tissue samples from 121 individuals (**Supplemental Figure 2**).

**Ventricular tissue:** In the Penn Study, there was no evidence of an association between *SCN5A* mRNA expression and rs10428132 genotype in the left ventricular samples from 313 individuals ( $p>0.05$ ). There was a trend towards an association between *SCN5A* expression and rs6599250 (a proxy for rs10428132 with an  $R^2=1.0$ ,  $P=0.08$ ). We also examined the results from the Gene-Tissue Expression (GTEx) Portal and found no association between *SCN5A* expression in 83 left ventricular samples and the following SNPs: rs10428132, rs6795970, rs6801957, rs6800541, rs6599250 (<http://www.gtexportal.org/home/> accessed 1/30/2017).

Figure S1

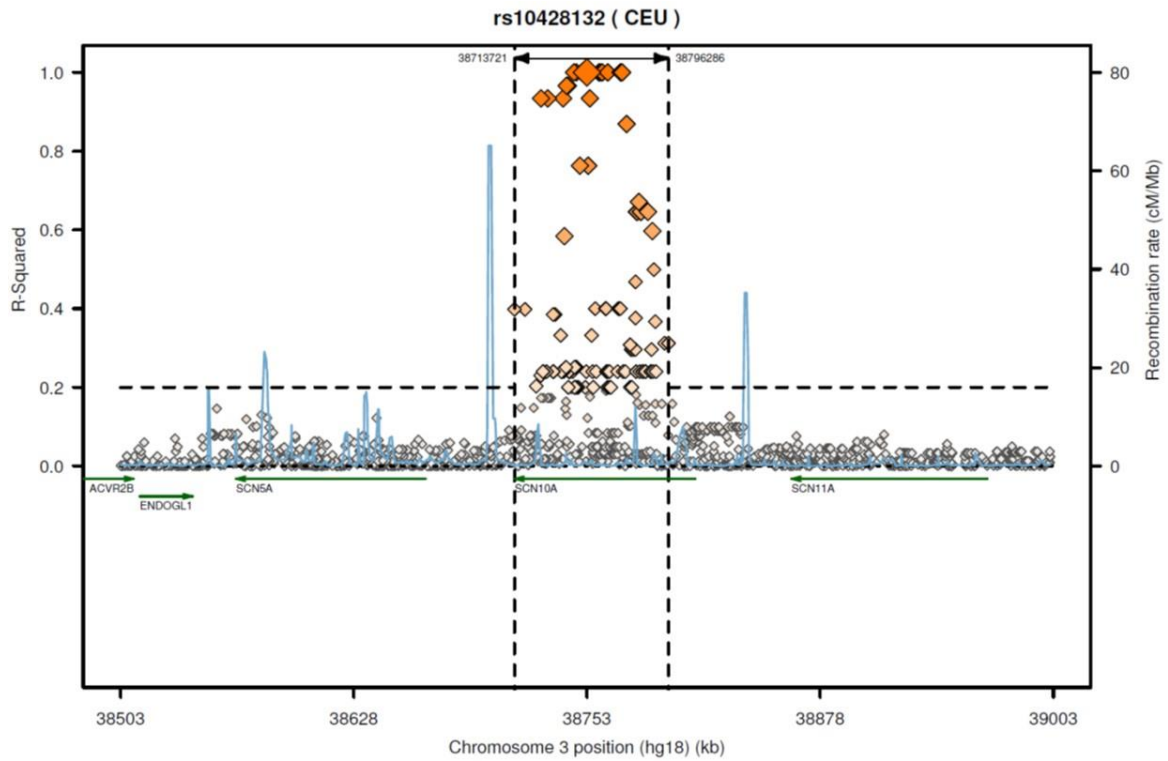

**Figure S1. LD plot of top *SCN10A* variant associated with PR interval.** Linkage Disequilibrium (LD) association plot of the top *SCN10A* single nucleotide polymorphism, rs10428132, identified from the *SCN10A* sequencing data associated with PR interval. The plot shows that only common variants in *SCN10A* are in LD with rs10428132. All other common variants in neighboring loci, in particular, *SCN5A* and *SCN11A* are not associated with the top *SCN10A* variant, rs10428132.

**Figure S2**

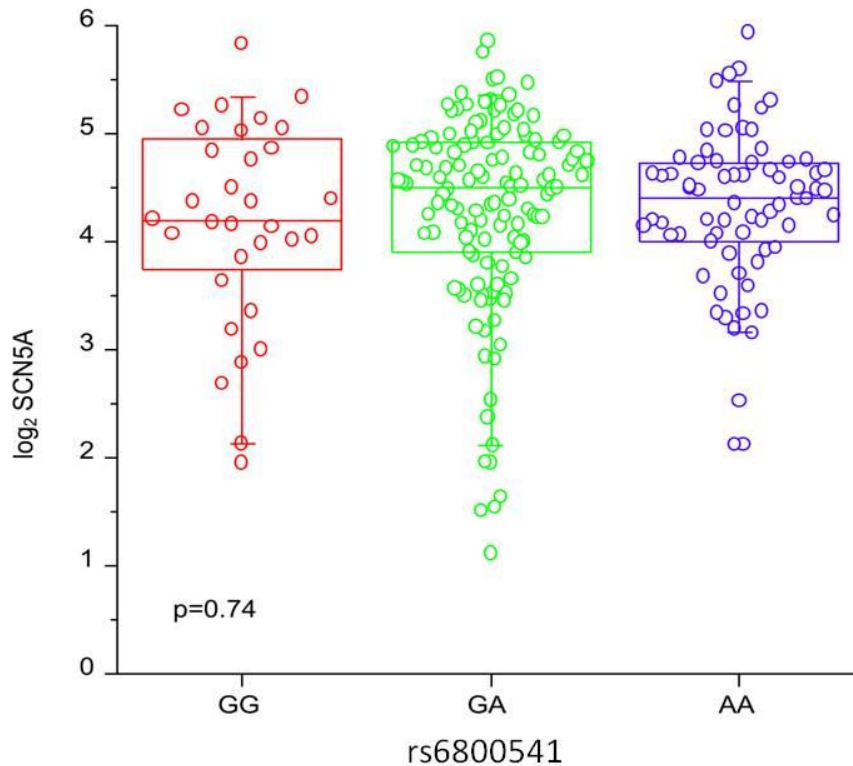

**Figure S2. eQTL Analysis.** Box-whisker plots show an eQTL analysis of left atrial appendage *SCN5A* and *SCN10A* mRNA expression vs. *rs6800541* genotype in a sample of 230 individuals of European ancestry from the Cleveland Clinic. Findings were similar for the other SNPs examined, *rs10428132*, *rs6795970*, and *rs6801957*, which are all in high LD with *rs6800541*. No association was seen between genotype and *SCN5A* expression. *SCN10A* was not reliably detectable due to low expression. The mRNA was quantified using Illumina HT12 v.3 expression arrays. Expression values were batch corrected, natural log-transformed, baseline corrected and quantile normalized. The lower and upper bounds of the box represent the 25<sup>th</sup> and 75<sup>th</sup> percentiles, with the mid-line showing the median value. The whiskers are plotted at the 5<sup>th</sup> and 95<sup>th</sup> percentile values. Gene expression was assessed by ANOVA and significance was determined using an F-statistic.

**Figure S3**

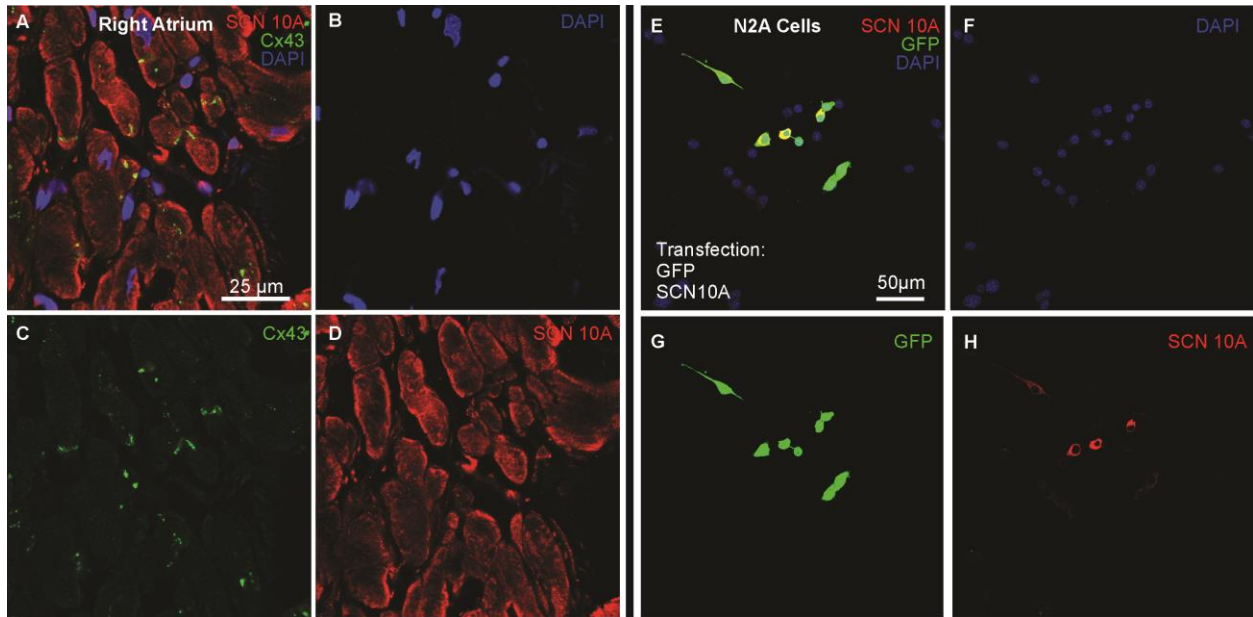

**Figure S3. *SCN10A* expression in human right atrium. Panels A-D:** Immunohistochemistry of right atrial tissue stained with anti-*SCN10A*, anti-Cx43, and DAPI demonstrates *SCN10A* expression in myocytes, with increased expression noted in the membrane at cell edges. **Panels E-F:** Verification of anti-*SCN10A* antibody efficacy in N2A cells co-transfected with separate constructs for GFP and WT *SCN10A*. GFP transfection reflects the transfection efficiency in N2A cells and confirms that transfection was successful in some cells. Intense red fluorescence from the *SCN10A* antibody in a similar cell subset confirms expression of *SCN10A* expression in these cells and the *SCN10A* antibody efficacy.

**Figure S4**

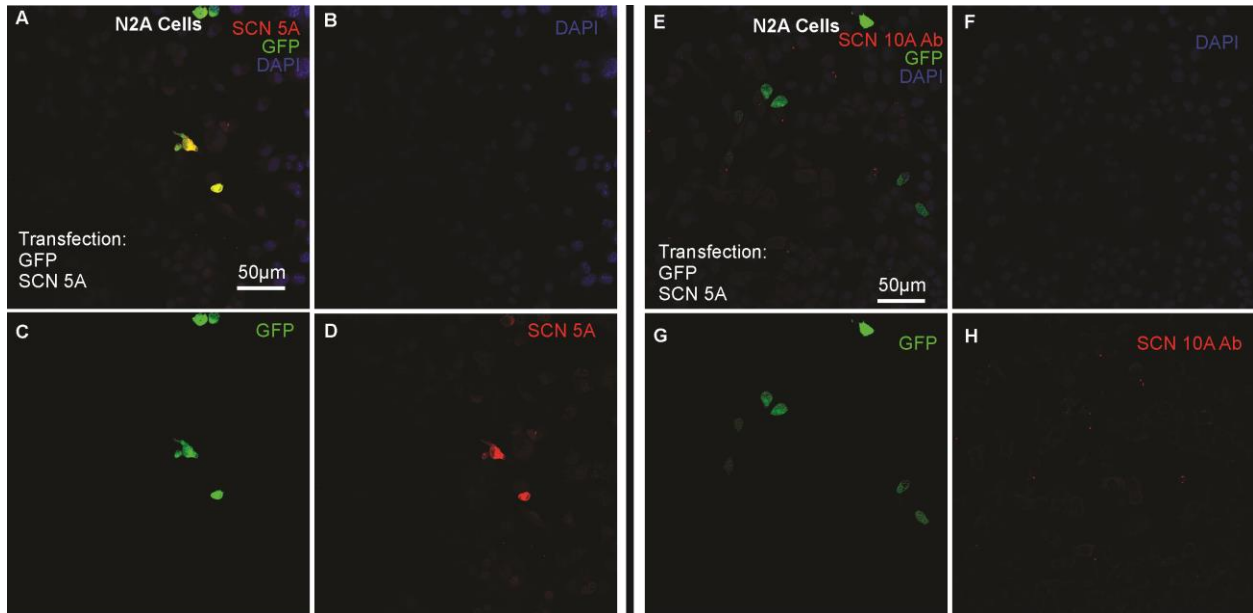

**Figure S4: Confirming *SCN10A* antibody specificity.** Panels A-D: N2A cells were co-transfected with separate GFP and *SCN5A* constructs. GFP expression confirms that transfection was successful, and intense red fluorescence in a subset of these cells confirms *SCN5A* expression. Panels E-H: N2A cells co-transfected with separate constructs of GFP and *SCN5A*, similar to Panels A-D. These cells were then treated with the *SCN10A* antibody. Lack of red fluorescence suggests that there is no appreciable binding of the *SCN10A* antibody to *SCN5A*.



**Figure S5**

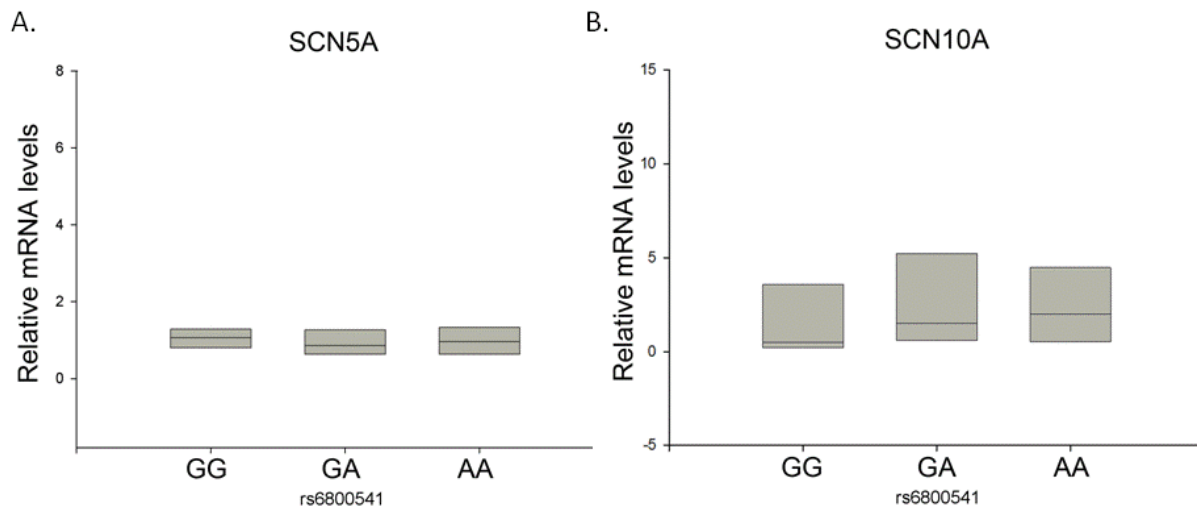

**Figure S5. *SCN5A* and *SCN10A* expression analysis associated with rs6800541 from left atrial appendage.**

Box plots show a quantitative PCR analysis from left atrial appendage of (A) *SCN5A* and (B) *SCN10A* expression versus rs6800541, from 121 individuals of European Ancestry from MGH. There was no association between genotype and *SCN5A* ( $p=0.71$ ) or *SCN10A* ( $p=0.14$ ) expression.

Figure S6

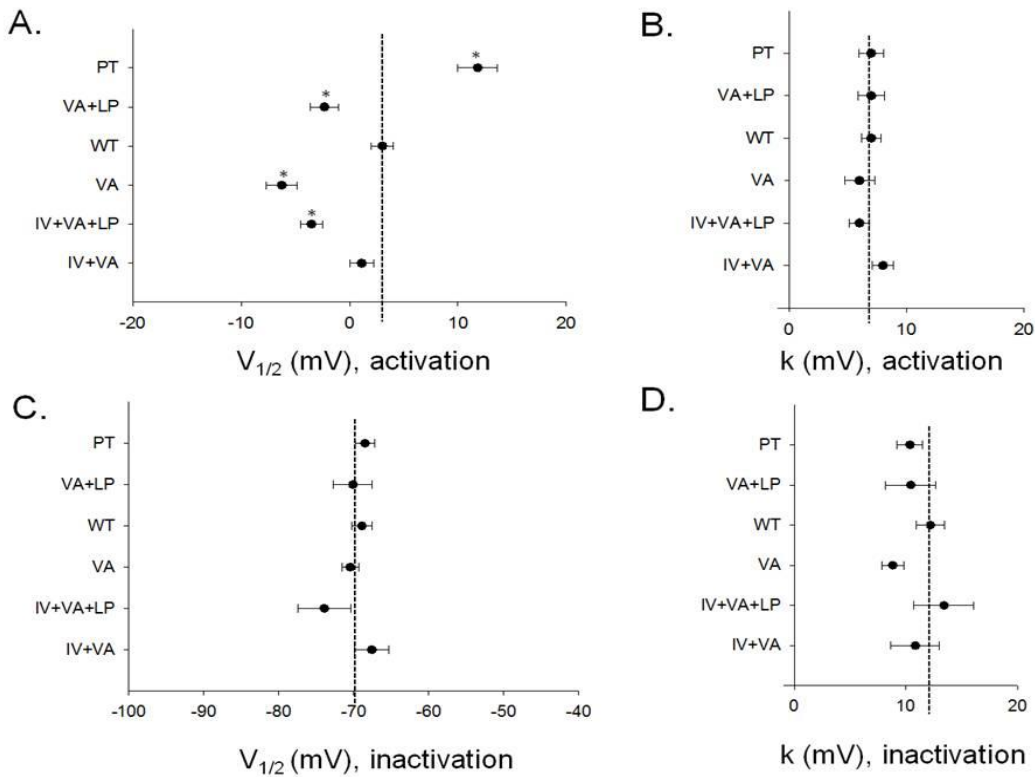

**Figure S6. Summary plots of activation and inactivation parameters of Nav1.8 haplotype channels. A, B)**

Summary plots of **channel activation** properties for  $V_{1/2}$  and slope ( $k$ ) for each haplotype generated from the fitted curves shown in figure 2B (see methods). The haplotypes are vertically plotted on the y-axis by their PR interval with shortest on the bottom and longest at the top. The  $V_{1/2}$  of channel activation had a modest relationship with haplotype. The  $V_{1/2}$  for PT was significantly left shifted and VA, VA+LP, and IV+VA+LP were both right shifted compared to wild type (WT). IV+VA was not significantly different from WT. The slopes for the haplotype variants were not significantly different from WT. **C, D)** Summary plots of channel inactivation properties for  $V_{1/2}$  and slope ( $k$ ) for each haplotype generated from the fitted curves shown in figure 3C (see methods). The  $V_{1/2}$  and slope for the haplotype variants were not significantly different from WT. The asterisks represent a significant difference compared to WT ( $p < 0.05$ ).

**Figure S7**

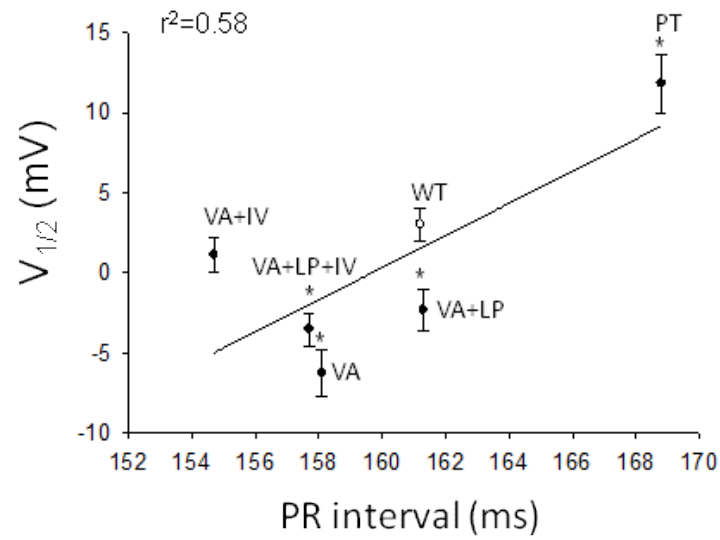

**Figure S7. Correlation plot for midpoint of activation versus haplotype.** The midpoint of activation ( $V_{1/2}$ ) for each haplotype is plotted against PR interval duration. The data were fitted with a straight line which gave a  $r^2 = 0.58$ ,  $P = 0.08$ . The asterisks represent a significant difference from wild type (t-test,  $p < 0.05$ )

Figure S8

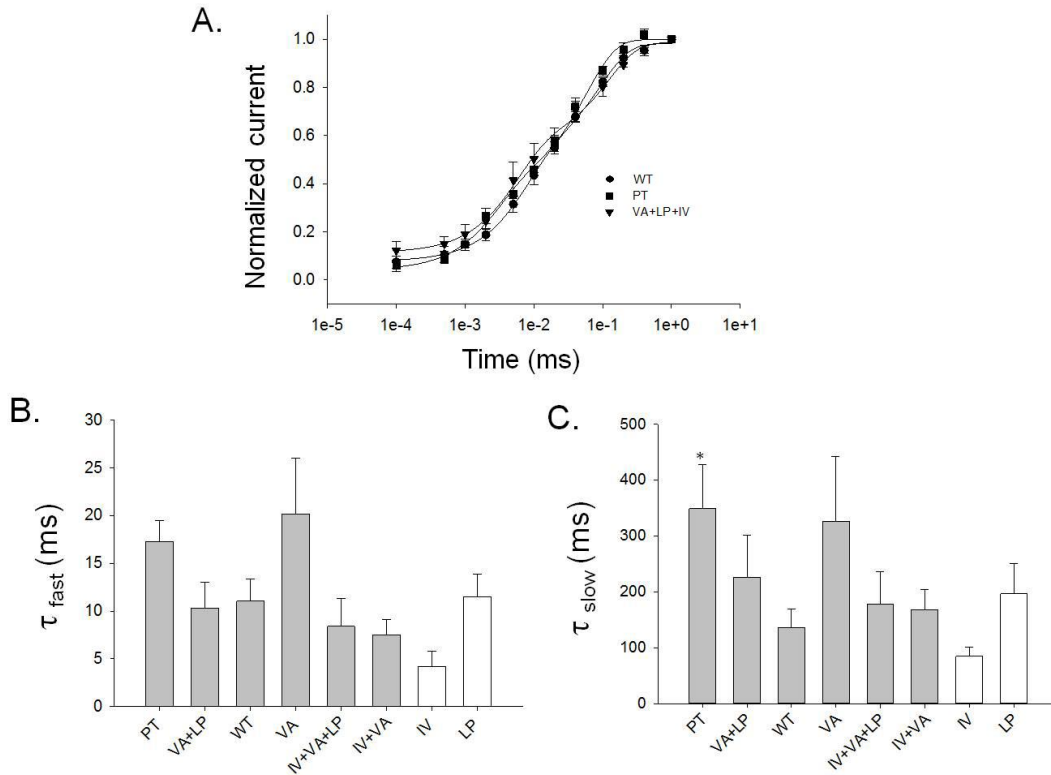

**Figure S8. Effect of haplotype and variant channels on the recovery of inactivation. A)** Plot of recovery from inactivation for wild type (WT, circles), PT (squares) and IV+VA+LP (inverted triangles), x-axis is interpulse duration at -100 mV (log scale). The smooth lines represent fits with a double exponential function. **B, C)** Plots of fast and slow time constants, respectively, for the all haplotypes (grey bars) and the two single variants which did not occur in isolation in the study populations (white bars). The slow time constant for PT was significantly different from WT ( $P=0.03$ ). The slow and fast time constants for the other haplotypes and variants were not significantly different from wild type ( $p>0.05$ ).

Figure S9

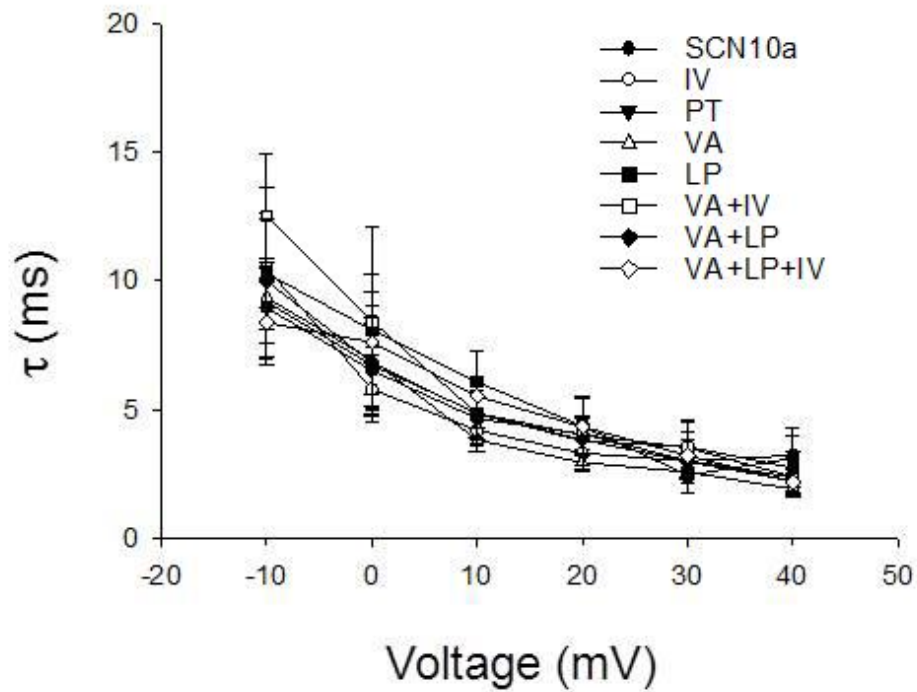

**Figure S9. No difference in the rate of open state inactivation between haplotype and variant channels.**

Plots of the time course of open state inactivation, time constant versus test voltage (-10, 0, 10, 20, 30, 40 mV), for wild type and haplotype variants (filled symbols), and the two single variants that did not occur in isolation in the study population (open symbols). Current traces were fitted with a single exponential for each test voltage. The time course of open state inactivation for each haplotype and the two variants were not significantly different from wild type ( $p > 0.05$ ).

**Table S1.** Cohort Characteristics.

| Study                                    | CHARGE Targeted Sequencing |            |            | Exome Sequencing Project |            |                   | CHARGE ExomeChip Genotyping |            |            |
|------------------------------------------|----------------------------|------------|------------|--------------------------|------------|-------------------|-----------------------------|------------|------------|
|                                          | ARIC                       | CHS        | FHS        | WHI                      | MESA       | African Americans | ARIC                        | CHS        | FHS        |
| <b>Number</b>                            | 1645                       | 1021       | 1033       | 525                      | 82         | 972               | 9828                        | 3256       | 7582       |
| <b>Ancestry</b>                          | EA                         | EA         | EA         | EA                       | EA         | AA                | EA                          | EA         | EA         |
| <b>Sex, men (%)</b>                      | 50.6                       | 45.8       | 47.5       | 0                        | 75.6       | 29.4              | 46.1                        | 40.4       | 45.2       |
| <b>Age, years</b>                        | 54.5 (5.7)                 | 72.2 (5.3) | 38.2 (9.5) | 63.9 (7.9)               | 60.7 (9.6) | 58.3 (8.8)        | 54.1 (5.7)                  | 72.4 (5.4) | 39.3 (9.8) |
| <b>PR interval, ms</b>                   | 164 (28)                   | 171 (32)   | 153 (23)   | 160 (25)                 | 163 (23)   | 168 (24)          | 160 (23)                    | 167 (28)   | 152 (22)   |
| <b>QRS interval, ms</b>                  | 92 (10)                    | 90 (12)    | 89 (10)    | 88 (13)                  | 95 (12)    | 91 (15)           | 91 (9)                      | 88 (10)    | 87 (9)     |
| <b>RR interval, ms</b>                   | 924 (138)                  | 951 (159)  | 843 (159)  | 160 (25)                 | 163 (23)   | 910 (159)         | 928 (136)                   | 955 (151)  | 920 (171)  |
| <b>Body mass index, kg/m<sup>2</sup></b> | 27.4 (5.8)                 | 26.8 (5.2) | 26.4 (6.3) | 29.0 (5.8)               | 28.1 (4.3) | 32.5 (9.0)        | 26.9 (4.7)                  | 26.7 (4.4) | 26.0 (5.0) |
| <b>Systolic blood pressure, mm Hg</b>    | 120 (19)                   | 136 (23)   | 121 (17)   | 133 (23)                 | 127 (23)   | 133 (22.5)        | 118 (17)                    | 135 (21)   | 119 (15)   |

Mean (standard deviation) unless otherwise indicated.

**Abbreviations:** EA, European American; AA, African American

**Table S2.** Complete list of variants identified at the *SCN10A* locus.

Please see the attached excel file entitled “Table S2.xlsx”. In worksheet “Coding” a list of coding variants identified in *SCN10A* is provided. Variants are categorized according to functional effect and PolyPhen-2, SIFT, PhyloP and LRT predictions are provided. In the worksheet “Non-coding”, a list of non-coding variants ordered by position is provided.

**Table S3. Coding variation summary**

**A.**

|                        | Common | Rare |
|------------------------|--------|------|
| nonsynonymous          | 7      | 121  |
| splicing;nonsynonymous | 0      | 4    |
| splicing               | 0      | 2    |
| stopgain               | 0      | 6    |
| synonymous             | 10     | 54   |

**B.**

|                              |            | <i>P</i> -value        |
|------------------------------|------------|------------------------|
| Synonymous/<br>Nonsynonymous |            | 4.56x10 <sup>-02</sup> |
| Missense Predictions         | PolyPhen-2 | 1.45x10 <sup>-02</sup> |
|                              | LRT        | 7.23x10 <sup>-03</sup> |
|                              | PhyloP     | 1.29x10 <sup>-05</sup> |
|                              | SIFT       | 1.65x10 <sup>-03</sup> |

**Table S3. Coding variation summary. A)** Functional class of coding variant identified in CHARGE sequencing.

We identified 327 common (MAF>1%) variants in the gene, of which 7 were missense and 10 were synonymous. Of 2882 rare variants, 327 were putatively functional (missense, nonsense, or splice). Four of the variants in splice sites fell on the exon side of the splice junction and also resulted in amino acid changes. Insertion / deletions were not assessed. **B)** Nonsynonymous variants tended to have a lower minor allele frequency than synonymous variants. Rarer variants were more likely to be associated with adverse bioinformatic predictions of function and conservation.



**Table S4.** Common *SCN10A* Variant Associations with the PR and QRS intervals (EA=European Americans, AA=African Americans)

| SNP ID             | Amino acid substitution | A1/A2 | CHARGE Targeted Sequencing (EA, n=3699) |                     |                       | Exome Sequencing Project (EA, n=607) |                      | Exome Sequencing Project (AA, n=972) |                     |                | CHARGE Exome Chip Project (EA, n=20666) |                     |                        |
|--------------------|-------------------------|-------|-----------------------------------------|---------------------|-----------------------|--------------------------------------|----------------------|--------------------------------------|---------------------|----------------|-----------------------------------------|---------------------|------------------------|
|                    |                         |       | Freq* (%)                               | $\beta$ (SE) [msec] | <i>P</i> value        | $\beta$ (SE) [msec]                  | <i>P</i> value       | Freq† (%)                            | $\beta$ (SE) [msec] | <i>P</i> value | Freq‡ (%)                               | $\beta$ (SE) [msec] | <i>P</i> value         |
| <b>PR interval</b> |                         |       |                                         |                     |                       |                                      |                      |                                      |                     |                |                                         |                     |                        |
| rs57326399         | I962V                   | T/C   | 25.2                                    | -2.22 (0.94)        | 6.7x10 <sup>-3</sup>  | -2.83 (1.54)                         | 0.07                 | 10.2                                 | 0.01 (1.83)         | 0.99           | 25.8                                    | -1.93 (0.25)        | 9.75x10 <sup>-15</sup> |
| rs73062575         | P1045T                  | G/T   | 2.4                                     | 5.36 (2.03)         | 6.8x10 <sup>-4</sup>  | 12.69 (3.70)                         | 6.5x10 <sup>-4</sup> | 0.6                                  | 10.79 (6.98)        | 0.12           | 2.7                                     | 3.4 (0.68)          | 4.87x10 <sup>-7</sup>  |
| rs6795970          | V1073A                  | A/G   | 58.3                                    | -3.94 (0.67)        | 8.9x10 <sup>-12</sup> | -5.13 (1.43)                         | 3.6x10 <sup>-4</sup> | 90.2                                 | -2.14 (1.89)        | 0.26           | 60.2                                    | -3.31 (0.22)        | 2.73x10 <sup>-49</sup> |
| rs12632942         | L1092P                  | A/G   | 23.6                                    | -2.12 (0.74)        | 5.2x10 <sup>-4</sup>  | -2.75 (1.56)                         | 0.08                 | 13.9                                 | 2.06 (1.59)         | 0.19           | 26.0                                    | -1.69 (0.25)        | 1.02x10 <sup>-11</sup> |
| rs74717885         | I206M                   | T/C   | 1.3                                     | -6.74 (3.03)        | 0.12                  | -1.19 (5.48)                         | 0.83                 | 0.2                                  | NA                  |                | 1.3                                     | -1.87 (2.86)        | 0.51                   |
| rs7630989          | S509P                   | A/G   | 2.7                                     | -4.75 (2.00)        | 0.20                  | -2.03 (4.46)                         | 0.65                 | 20.9                                 | -1.6 (1.31)         | 0.22           | 3.1                                     | -2.23 (1.92)        | 0.25                   |
| rs77804526         | V1697I                  | C/T   | 1.0                                     | -5.60 (3.44)        | 0.80                  | 1.40 (5.95)                          | 0.82                 | 0.2                                  | NA                  |                | 1.3                                     | -1.51 (3.0)         | 0.61                   |
| rs6800541          | PR GWAS                 | C/T   | 58.6                                    | -4.15 (0.66)        | 4.0x10 <sup>-14</sup> |                                      |                      |                                      |                     |                |                                         |                     |                        |
| rs6801957          | QRS GWAS                | T/C   | 58.3                                    | -4.06 (0.66)        | 3.0x10 <sup>-14</sup> |                                      |                      |                                      |                     |                |                                         |                     |                        |
| rs10428132         | PR, This Study          | T/G   | 57.8                                    | -4.17 (0.66)        | 1.5x10 <sup>-14</sup> |                                      |                      |                                      |                     |                |                                         |                     |                        |
| rs6599251          | QRS, This Study         | G/T   | 53.2                                    | -3.40 (0.65)        | 6.5x10 <sup>-12</sup> |                                      |                      |                                      |                     |                |                                         |                     |                        |

**QRS interval**

|            |                |     |      |                 |                      |                 |      |      |                 |      |      |                 |                       |
|------------|----------------|-----|------|-----------------|----------------------|-----------------|------|------|-----------------|------|------|-----------------|-----------------------|
| rs57326399 | I962V          | T/C | 25.2 | -0.63<br>(0.37) | 0.079                | -0.09<br>(0.59) | 0.88 | 10.4 | -0.41<br>(0.73) | 0.58 | 26.0 | -0.55<br>(0.1)  | 2.4x10 <sup>-8</sup>  |
| rs73062575 | P1045T         | G/T | 2.4  | 0.71<br>(0.80)  | 0.043                | 1.68<br>(1.40)  | 0.23 | 0.5  | 2.24<br>(3.01)  | 0.46 | 2.7  | 0.9<br>(0.27)   | 8.1x10 <sup>-4</sup>  |
| rs6795970  | V1073A         | A/G | 58.3 | -0.89<br>(0.25) | 3.2x10 <sup>-4</sup> | -0.16<br>(0.59) | 0.79 | 90.7 | 0.27<br>(0.77)  | 0.72 | 60.3 | -0.67<br>(0.09) | 5.7x10 <sup>-14</sup> |
| rs12632942 | L1092P         | A/G | 23.6 | -0.60<br>(0.28) | 0.058                | 0.37<br>(0.55)  | 0.5  | 14.1 | -0.57<br>(0.64) | 0.37 | 25.8 | -0.44<br>(0.1)  | 8.8x10 <sup>-6</sup>  |
| rs74717885 | I206M          | T/C | 1.3  | -2.29<br>(1.12) | 0.31                 | 0.12<br>(2.06)  | 0.95 | 0.2  | NA              |      |      |                 |                       |
| rs7630989  | S509P          | A/G | 2.7  | -0.85<br>(0.76) | 0.45                 | 0.27<br>(1.71)  | 0.87 | 20.8 | 0.36<br>(0.53)  | 0.5  |      |                 |                       |
| rs77804526 | V1697I         | C/T | 1.0  | -3.49<br>(1.35) | 0.10                 | -0.96<br>(2.23) | 0.67 | 0.2  | NA              |      |      |                 |                       |
| rs6800541  | PR GWAS        | C/T | 58.6 | -0.91<br>(0.25) | 4.6x10 <sup>-4</sup> |                 |      |      |                 |      |      |                 |                       |
| rs6801957  | QRS GWAS       | T/C | 58.3 | -0.82<br>(0.25) | 5.7x10 <sup>-4</sup> |                 |      |      |                 |      |      |                 |                       |
| rs10428132 | PR This Study  | T/G | 57.8 | -0.78<br>(0.25) | 2.0x10 <sup>-3</sup> |                 |      |      |                 |      |      |                 |                       |
| rs6599251  | QRS This Study | G/T | 53.2 | -0.73<br>(0.25) | 1.2x10 <sup>-4</sup> |                 |      |      |                 |      |      |                 |                       |

\*Frequency in CHARGE Targeted Sequencing Study population, †Frequency in ESP African American population, ‡ Frequency in Exome Chip population

**Abbreviations:** EA, European American; AA, African American; Freq, coded allele frequency; A1 non-coded allele, A2 coded allele

**Table S5.** Correlation ( $r^2$ ) between SNPs previously reported to be associated with PR and QRS interval duration with each other (rs6801957 and rs6800541, respectively), with the most significant intronic variants for PR and QRS intervals reported in this manuscript (rs10428132 and rs6599251, respectively), with the four coding variants associated with cardiac conduction identified by this study (rs57326399, rs73062575, rs6795970, rs12632942), and with the 3 coding variants identified in this study but not associated with PR or QRS intervals (rs74717885, rs7630989, rs77804526).

|            | rs10428132<br>This study PR,<br>intronic | rs6599251<br>This study QRS,<br>intronic | rs6801957<br>Prior QRS<br>GWAS,<br>intronic | rs6800541<br>Prior PR<br>GWAS,<br>intronic | rs57326399<br>I962V | rs73062575<br>(P1045T) | rs6795970<br>(V1073A) | rs12632942<br>(L1092P) | rs74717885<br>(I206M) | rs7630989<br>(S509P) | rs77804526<br>(V1697I) |
|------------|------------------------------------------|------------------------------------------|---------------------------------------------|--------------------------------------------|---------------------|------------------------|-----------------------|------------------------|-----------------------|----------------------|------------------------|
| rs10428132 | 1                                        | 0.86                                     | 0.92                                        | 0.97                                       | 0.21                | 0.04                   | 0.83                  | 0.21                   | 0.01                  | 0.02                 | 0.01                   |
| rs6599251  |                                          | 1                                        | 0.79                                        | 0.83                                       | 0.25                | 0.04                   | 0.72                  | 0.25                   | 0.02                  | 0.03                 | 0.01                   |
| rs6801957  |                                          |                                          | 1                                           | 0.88                                       | 0.25                | 0.03                   | 0.87                  | 0.24                   | 0                     | 0.01                 | 0                      |
| rs6800541  |                                          |                                          |                                             | 1                                          | 0.2                 | 0.04                   | 0.85                  | 0.21                   | 0.01                  | 0.02                 | 0.01                   |
| rs57326399 |                                          |                                          |                                             |                                            | 1                   | 0.01                   | 0.21                  | 0.76                   | 0                     | 0.01                 | 0                      |
| rs73062575 |                                          |                                          |                                             |                                            |                     | 1                      | 0.03                  | 0.02                   | 0                     | 0                    | 0                      |
| rs6795970  |                                          |                                          |                                             |                                            |                     |                        | 1                     | 0.21                   | 0                     | 0.01                 | 0                      |
| rs12632942 |                                          |                                          |                                             |                                            |                     |                        |                       | 1                      | 0                     | 0.01                 | 0                      |
| rs74717885 |                                          |                                          |                                             |                                            |                     |                        |                       |                        | 1                     | 0.23                 | 0.69                   |
| rs7630989  |                                          |                                          |                                             |                                            |                     |                        |                       |                        |                       | 1                    | 0.23                   |
| rs77804526 |                                          |                                          |                                             |                                            |                     |                        |                       |                        |                       |                      | 1                      |

**Table S6.** Study samples and tissue sources for eQTL analyses

| Study                                       | Tissue source                             | Number of samples | Reference |
|---------------------------------------------|-------------------------------------------|-------------------|-----------|
| <b>Cleveland Clinic eQTL</b>                | Left atrial appendage (European ancestry) | 230               | -         |
|                                             | Left atrial appendage (African Americans) | 34                | -         |
| <b>Penn eQTL</b>                            | Left atrium                               | 53                | -         |
|                                             | Right atrium                              | 52                | -         |
|                                             | Left ventricle                            | 313               |           |
| <b>MGH</b>                                  | Left atrial appendage                     | 121               |           |
| <b>Framingham Heart Study SABRe project</b> | Whole blood                               | 2446              |           |
| <b>eQTL Browser and GTEx Browser:</b>       |                                           |                   |           |
| Dimas_fibroQTL                              | Fibroblasts                               | 75                | 15        |
| Dimas_lymphoQTL                             | LCLs                                      | 75                | 15        |
| Dimas_TcellsQTL                             | T-cells                                   | 75                | 15        |
| Montgomery_transcriptQTL                    | LCLs                                      | 60                | 16        |
| Montgomery_exonQTL                          | LCLs                                      | 60                | 16        |
| Myers_eqtl                                  | Brain cortex                              | 279               | 17        |
| Pickrell_eqtl                               | LCLs                                      | 69                | 18        |
| Pickrell_sqtl                               | LCLs                                      | 69                | 18        |
| Schadt_eqtl                                 | Liver                                     | 427               | 19        |
| Stranger_eqtl                               | LCLs                                      | 210               | 20        |
| Veyrieras_PP_eqtl                           | LCLs                                      | 210               | 21        |
| Veytieras_PVALUE_eqtl                       | LCLs                                      | 210               | 21        |
| Zeller_eqtl                                 | Monocytes                                 | 1490              | 22        |
| Gibbs_cerebellum                            | Brain Cerebellum                          | 143               | 23        |
| Gibbs_fontal_cortex                         | Brain Frontal Cortex                      | 143               | 23        |
| Gibbs_temporal_cortex                       | Brain Temporal Cortex                     | 144               | 23        |
| Gibbs_pons                                  | Brain Pons                                | 142               | 23        |
| LCL: lymphoblastoid cell lines              |                                           |                   |           |

**Table S7.** Quantitative PCR primer pairs for detection of SCN5A and SCN10A in left atrial appendage samples from MGH.

| <b>Primer name</b> | <b>Sequence</b>                     |
|--------------------|-------------------------------------|
| SCN5A-forward      | 5'- CTGACCTCACCATCACTATGTG -3'      |
| SCN5A-reverse      | 5'- GCTGTGAAAATCCCTGTGAAG -3'       |
| SCN10A-forward     | 5'- TTGCTGAGGGTGAATCTGATC -3'       |
| SCN10A-reverse     | 5'- CACACCTCTCGACTTGCTG -3'         |
| TBP-forward        | 5'-GAATATAATCCCAAGCGGTTTG-3'        |
| TBP-reverse        | 5'-ACTTCACATCACAGCTCCCC-3'          |
| HPRT-forward       | 5'-ATCAGACTGAAGAGCTATTGTAATGACCA-3' |
| HPRT-reverse       | 5'-TGGCTTATATCCAACACTTCGTG-3'       |

**Table S8.** PR interval conditioned analysis of *SCN10A* common variants in ESP with *SCN5A* and *SCN11A* common variants

| SNP ID     | Amino acid substitution | A1/A2 | Freq (%) | PR Interval            |                      | Conditioned PR Interval* |                      |
|------------|-------------------------|-------|----------|------------------------|----------------------|--------------------------|----------------------|
|            |                         |       |          | $\beta$ (SE)<br>[msec] | <i>P</i> value       | $\beta$ (SE)<br>[msec]   | <i>P</i> value       |
| rs57326399 | I962V                   | T/C   | 25.2     | -2.83 (1.54)           | 0.07                 | -2.61 (1.63)             | 0.11                 |
| rs73062575 | P1045T                  | G/T   | 2.4      | 12.69 (3.70)           | 6.5x10 <sup>-4</sup> | 12.6 (3.76)              | 8.6x10 <sup>-4</sup> |
| rs6795970  | V1073A                  | A/G   | 58.3     | -5.13 (1.43)           | 3.6x10 <sup>-4</sup> | -5.18 (1.46)             | 4.1x10 <sup>-4</sup> |
| rs12632942 | L1092P                  | A/G   | 23.6     | -2.75 (1.56)           | 0.08                 | -2.56 (1.64)             | 0.12                 |
| rs74717885 | I206M                   | T/C   | 1.3      | -1.19 (5.48)           | 0.83                 | -1.45 (5.53)             | 0.79                 |
| rs7630989  | S509P                   | A/G   | 2.7      | -2.03 (4.46)           | 0.65                 | -2.07 (4.48)             | 0.64                 |
| rs77804526 | V1697I                  | C/T   | 1.0      | 1.40 (5.95)            | 0.82                 | -1.49 (6.01)             | 0.80                 |

\*PR interval conditioned on all common nonsynonymous SNPs in adjacent sodium channels *SCN5A* (rs1805124, MAF=24%) and *SCN11A* (rs72869687, MAF=1.1%; rs33985936, MAF=25%; rs13059805, MAF=2.6%)

**Abbreviations:** Freq, coded allele frequency; A1 non-coded allele, A2 coded allele

**Table S9.** Haplotype associations with QRS interval

| Haplotype Name | Variants in Haplotype | Alleles* | European Americans |                           | African Americans |                           | QRS Association (EA and AA) |
|----------------|-----------------------|----------|--------------------|---------------------------|-------------------|---------------------------|-----------------------------|
|                |                       |          | Freq <sup>†</sup>  | QRS interval <sup>‡</sup> | Freq <sup>†</sup> | QRS interval <sup>‡</sup> | P-value                     |
| IV+VA          | I962V+V1073A          | V P A L  | 1.7 (.24)          | 89.86 (1.50)              | 0 (.16)           | NA                        | 0.71                        |
| IV+VA+LP       | I962V+V1073A+L1092P   | V P A P  | 25.6 (.83)         | 88.58 (0.34)              | 10 (.68)          | 88.54 (0.73)              | 0.13                        |
| VA             | V1073A                | I P A L  | 32.2 (.89)         | 88.50 (0.32)              | 75.9 (.97)        | 88.82 (0.76)              | 0.84                        |
| WT             | WT                    | I P V L  | 35.9 (.91)         | 88.65 (0.30)              | 9.2 (.66)         | 88.66 (0.73)              | Reference                   |
| VA+LP          | V1073A+L1092P         | I P A P  | 1.4 (.21)          | 89.60 (1.75)              | 4 (.45)           | 88.32 (1.12)              | 0.64                        |
| PT             | P1045T                | I T V L  | 3.1 (.32)          | 90.31 (1.11)              | 0.6 (.18)         | 89.20 (4.20)              | 0.53                        |

\*Specific alleles listed in order from 5' end of gene for the four variants: I962V, P1045T, V1073A, L1092P; <sup>†</sup>% Frequency (SE); <sup>‡</sup>Mean, msec (SE)

**Table S10.** Expression of *SCN10A*/Nav1.8 channels in cardiac tissue.

|                               | <b>Atria</b>                                        | <b>Purkinje Fibers</b>   | <b>Ventricle</b>                                                         | <b>Neuronal</b>                                              |
|-------------------------------|-----------------------------------------------------|--------------------------|--------------------------------------------------------------------------|--------------------------------------------------------------|
| <b>Transcript</b>             | Present: H <sup>24</sup> , M <sup>24,25</sup>       | Present: M <sup>26</sup> | Present: H <sup>24</sup> , M <sup>24-26</sup><br>Absent: M <sup>27</sup> | N/A                                                          |
| <b>Protein</b>                | Present: H <sup>28</sup><br>Absent: M <sup>29</sup> | N/A                      | Absent: M <sup>29</sup>                                                  | Present: H <sup>28</sup> , M <sup>29</sup> , C <sup>30</sup> |
| <b>I<sub>Na1.8</sub> late</b> | Absent: M <sup>29</sup>                             | N/A                      | Present: M <sup>25,27</sup> , R <sup>25</sup><br>Absent: M <sup>29</sup> | Present: M <sup>29</sup>                                     |

H, M, C, and R refer to human, mouse, canine, and rabbit, respectively. N/A: no applicable data available



## Supplemental Acknowledgements

**Atherosclerosis Risk in Communities (ARIC):** NHLBI (N01 HC-55015, N01 HC-55016, N01HC-55017, N01 HC-55018, N01 HC-55019, N01 HC-55020, N01 HC-55021); **Cardiovascular Health Study (CHS):** NHLBI (N01-HC-85239, N01-HC-85079 through N01-HC-85086, N01-HC-35129, N01 HC-15103, N01 HC-55222, N01-HC-75150, N01-HC-45133, HHSN268201200036C, and grant HL080295), with additional support from NINDS and from NIA (AG-023629, AG-15928, AG-20098, and AG-027058); **Coronary Artery Risk Development in Young Adults (CARDIA):** NHLBI (N01-HC95095 & N01-HC48047, N01-HC48048, N01-HC48049, and N01-HC48050); **Framingham Heart Study (FHS):** NHLBI (N01-HC-25195 and grant R01 NS17950) with additional support from NIA (AG08122 and AG033193); **Jackson Heart Study (JHS):** NHLBI and the National Institute on Minority Health and Health Disparities (N01 HC-95170, N01 HC-95171 and N01 HC-95172); **Multi-Ethnic Study of Atherosclerosis (MESA):** NHLBI (N01-HC-95159 through N01-HC-95169 and RR-024156).

**Cystic Fibrosis (CF):** Cystic Fibrosis Foundation (GIBSON07K0, KNOWLE00A0, OBSERV04K0, RDP R026), the NHLBI (R01 HL-068890, R02 HL-095396), NIH National Center for Research Resources (UL1 RR-025014), and the National Human Genome Research Institute (NHGRI) (5R00 HG-004316). **Chronic Obstructive Pulmonary Disease (COPDGene):** NHLBI (U01 HL-089897, U01 HL-089856), and the COPD Foundation through contributions made to an Industry Advisory Board comprised of AstraZeneca, Boehringer Ingelheim, Novartis, Pfizer, and Sunovian. The COPDGene clinical centers and investigators are available at [www.copdgene.org](http://www.copdgene.org). **Acute Lung Injury (ALI):** NHLBI (RC2 HL-101779). **Lung Health Study (LHS):** NHLBI (RC2 HL-066583), the NHGRI (HG-004738), and the NHLBI Division of Lung Diseases (HR-46002). **Pulmonary Arterial Hypertension (PAH):** NIH (P50 HL-084946, K23 AR-52742), and the NHLBI (F32 HL-083714). **Asthma:** NHLBI (RC2 HL-101651), and the NIH (HL-077916, HL-69197, HL-76285, M01 RR-07122).

**SWISS and ISGS:** Siblings with Ischemic Stroke Study (SWISS): National Institute of Neurological Disorders and Stroke (NINDS) (R01 NS039987); Ischemic Stroke Genetics Study (ISGS): NINDS (R01 NS042733)

**Women's Health Initiative (WHI):** The WHI Sequencing Project is funded by the NHLBI (HL-102924) as well as the National Institutes of Health (NIH), U.S. Department of Health and Human Services through contracts N01WH22110, 24152, 32100-2, 32105-6, 32108-9, 32111-13, 32115, 32118-32119, 32122, 42107-26, 42129-32, and 44221, and HHSN268201100046C. The authors thank the WHI investigators and staff for their dedication, and the study participants for making the program possible. A full listing of WHI investigators can be found at:

<https://cleo.whi.org/researchers/Documents%20%20Write%20a%20Paper/WHI%20Investigator%20Short%20List.pdf>

## **NHLBI GO Exome Sequencing Project**

**BroadGO:** Stacey B. Gabriel (Broad Institute), David M. Altshuler (Broad Institute, Harvard Medical School, Massachusetts General Hospital), Gonçalo R. Abecasis (University of Michigan), Hooman Allayee (University of Southern California), Sharon Cresci (Washington University School of Medicine), Mark J. Daly (Broad Institute, Massachusetts General Hospital), Paul I. W. de Bakker (Broad Institute, Harvard Medical School, University Medical Center Utrecht), Mark A. DePristo (Broad Institute), Ron Do (Broad Institute), Peter Donnelly (University of Oxford), Deborah N. Farlow (Broad Institute), Tim Fennell (Broad Institute), Kiran Garimella (University of Oxford) Stanley L. Hazen (Cleveland Clinic), Youna Hu (University of Michigan), Daniel M. Jordan (Harvard Medical School, Harvard University), Goo Jun (University of Michigan), Sekar Kathiresan (Broad Institute, Harvard Medical School, Massachusetts General Hospital), Hyun Min Kang (University of Michigan), Adam Kiezun (Broad Institute), Guillaume Lettre (Broad Institute, Montreal Heart Institute, Université de Montréal), Bingshan Li (University of Michigan), Mingyao Li (University of Pennsylvania), Christopher H. Newton-Cheh (Broad Institute, Massachusetts General Hospital, Harvard Medical School), Sandosh Padmanabhan (University of Glasgow School of Medicine), Gina Peloso (Broad Institute, Harvard Medical School, Massachusetts General Hospital), Sara Pulit (Broad Institute), Daniel J. Rader (University of Pennsylvania), David Reich (Broad Institute, Harvard Medical School), Muredach P. Reilly (University of Pennsylvania), Manuel A. Rivas (Broad Institute, Massachusetts General Hospital), Steve Schwartz (Fred Hutchinson Cancer Research Center), Laura Scott (University of Michigan), David S. Siscovick (University of Washington), John A. Spertus (University of Missouri Kansas City), Nathaniel O. Stitzel (Brigham and Women's Hospital), Nina Stoletzki (Brigham and Women's Hospital, Broad Institute, Harvard Medical School), Shamil R. Sunyaev (Brigham and Women's Hospital, Broad Institute, Harvard Medical School), Benjamin F. Voight (Broad Institute, Massachusetts General Hospital), Cristen J. Willer (University of Michigan)

**HeartGO:** Stephen S. Rich (University of Virginia), Ermeg Akyzbekova (Jackson State University, University of Mississippi Medical Center), Larry D. Atwood\* (Boston University), Christie M. Ballantyne (Baylor College of Medicine, Methodist DeBaKey Heart Center), Maja Barbalic (University of Texas Health Science Center Houston), R. Graham Barr (Columbia University Medical Center), Emelia J. Benjamin (Boston University), Joshua Bis (University of Washington), Eric Boerwinkle (University of Texas Health Science Center Houston), Donald W. Bowden (Wake Forest University), Jennifer Brody (University of Washington), Matthew Budoff (Harbor-UCLA Medical Center), Greg Burke (Wake Forest University), Sarah Buxbaum (Jackson State University), Jeff Carr (Wake Forest University), Donna T. Chen (University of Virginia), Ida Y. Chen (Cedars-Sinai Medical Center), Wei-Min Chen (University of Virginia), Pat Concannon (University of Virginia), Jacy Crosby (University of Texas Health Science Center Houston), L. Adrienne Cupples (Boston University), Ralph D'Agostino (Boston University), Anita L. DeStefano (Boston University), Albert Dreisbach (University of Mississippi Medical Center), Josée Dupuis (Boston University), J. Peter Durda (University of Vermont), Jaclyn Ellis (University of North Carolina Chapel Hill), Aaron R. Folsom (University of Minnesota), Myriam Fornage (University of Texas Health Science Center Houston), Caroline S. Fox (National Heart, Lung, and Blood Institute), Ervin Fox (University of Mississippi Medical Center), Vincent Funari (Cedars-Sinai Medical Center), Santhi K. Ganesh (University of Michigan), Julius Gardin (Hackensack University Medical Center), David Goff (Wake Forest University), Ora Gordon (Cedars-Sinai Medical Center), Wayne Grody (University of California Los Angeles), Myron Gross (University of Minnesota), Xiuqing Guo (Cedars-Sinai Medical Center), Ira M. Hall (University of Virginia), Nancy L. Heard-Costa (Boston University), Susan R. Heckbert (University of Washington), Nicholas Heintz (University of Vermont), David M. Herrington (Wake Forest University), DeMarc Hickson (Jackson State University, University of Mississippi Medical Center), Jie Huang (National Heart, Lung, and Blood Institute), Shih-Jen Hwang (Boston University, National Heart, Lung, and Blood Institute), David R. Jacobs (University of Minnesota), Nancy S. Jenny (University of Vermont), Andrew D. Johnson (National

Heart, Lung, and Blood Institute), Craig W. Johnson (University of Washington), Steven Kawut (University of Pennsylvania), Richard Kronmal (University of Washington), Raluca Kurz (Cedars-Sinai Medical Center), Ethan M. Lange (University of North Carolina Chapel Hill), Leslie A. Lange (University of North Carolina Chapel Hill), Martin G. Larson (Boston University), Mark Lawson (University of Virginia), Cora E. Lewis (University of Alabama at Birmingham), Daniel Levy (National Heart, Lung, and Blood Institute), Dalin Li (Cedars-Sinai Medical Center), Honghuang Lin (Boston University), Chunyu Liu (National Heart, Lung, and Blood Institute), Jiankang Liu (University of Mississippi Medical Center), Kiang Liu (Northwestern University), Xiaoming Liu (University of Texas Health Science Center Houston), Yongmei Liu (Wake Forest University), William T. Longstreth (University of Washington), Cay Loria (National Heart, Lung, and Blood Institute), Thomas Lumley (University of Auckland), Kathryn Lunetta (Boston University), Aaron J. Mackey (University of Virginia), Rachel Mackey (University of Pittsburgh), Ani Manichaikul (University of Virginia), Taylor Maxwell (University of Texas Health Science Center Houston), Barbara McKnight (University of Washington), James B. Meigs (Brigham and Women's Hospital, Harvard Medical School, Massachusetts General Hospital), Alanna C. Morrison (University of Texas Health Science Center Houston), Solomon K. Musani (University of Mississippi Medical Center), Josyf C. Mychaleckyj (University of Virginia), Jennifer A. Nettleton (University of Texas Health Science Center Houston), Kari North (University of North Carolina Chapel Hill), Christopher J. O'Donnell (Massachusetts General Hospital, National Heart, Lung, and Blood Institute), Daniel O'Leary (Tufts University School of Medicine), Frank S. Ong (Cedars-Sinai Medical Center), Walter Palmas (Columbia University), James S. Pankow (University of Minnesota), Nathan D. Pankratz (Indiana University School of Medicine), Shom Paul (University of Virginia), Marco Perez (Stanford University School of Medicine), Sharina D. Person (University of Alabama at Birmingham, University of Alabama at Tuscaloosa), Joseph Polak (Tufts University School of Medicine), Wendy S. Post (Johns Hopkins University), Bruce M. Psaty (Group Health Research Institute, University of Washington), Aaron R. Quinlan (University of Virginia), Leslie J. Raffel (Cedars-Sinai Medical Center), Vasana S. Ramachandran (Boston University), Alexander P. Reiner (Fred Hutchinson Cancer Research Center, University of Washington), Kenneth Rice (University of Washington), Jerome I. Rotter (Cedars-Sinai Medical Center), Jill P. Sanders (University of Vermont), Pamela Schreiner (University of Minnesota), Sudha Seshadri (Boston University), Steve Shea (Brigham and Women's Hospital, Harvard University), Stephen Sidney (Kaiser Permanente Division of Research, Oakland, CA), Kevin Silverstein (University of Minnesota), David S. Siscovick (University of Washington), Nicholas L. Smith (University of Washington), Nona Sotoodehnia (University of Washington), Asoke Srinivasan (Tougaloo College), Herman A. Taylor (Jackson State University, Tougaloo College, University of Mississippi Medical Center), Kent Taylor (Cedars-Sinai Medical Center), Fridtjof Thomas (University of Texas Health Science Center Houston), Russell P. Tracy (University of Vermont), Michael Y. Tsai (University of Minnesota), Kelly A. Volcik (University of Texas Health Science Center Houston), Christina L. Wassel (University of California San Diego), Karol Watson (University of California Los Angeles), Gina Wei (National Heart, Lung, and Blood Institute), Wendy White (Tougaloo College), Kerri L. Wiggins (University of Vermont), Jemma B. Wilk (Boston University), O. Dale Williams (Florida International University), Gregory Wilson (Jackson State University), James G. Wilson (University of Mississippi Medical Center), Phillip Wolf (Boston University), Neil A. Zakai (University of Vermont)

**ISGS and SWISS:** John Hardy (Reta Lila Weston Research Laboratories, Institute of Neurology, University College London), James F. Meschia (Mayo Clinic), Michael Nalls (National Institute on Aging), Stephen S. Rich (University of Virginia), Andrew Singleton (National Institute on Aging), Brad Worrall (University of Virginia)

**LungGO:** Michael J. Bamshad (Seattle Children's Hospital, University of Washington), Kathleen C. Barnes (Johns Hopkins University), Ibrahim Abdulhamid (Children's Hospital of Michigan), Frank Accurso (University of Colorado), Ran Anbar (Upstate Medical University), Terri Beaty (Johns Hopkins University), Abigail Bigham

(University of Washington), Phillip Black (Children's Mercy Hospital), Eugene Bleecker (Wake Forest University), Kati Buckingham (University of Washington), Anne Marie Cairns (Maine Medical Center), Wei-Min Chen (University of Virginia), Daniel Caplan (Emory University), Barbara Chatfield (University of Utah), Aaron Chidekel (A.I. Dupont Institute Medical Center), Michael Cho (Brigham and Women's Hospital, Harvard Medical School), David C. Christiani (Massachusetts General Hospital), James D. Crapo (National Jewish Health), Julia Crouch (Seattle Children's Hospital), Denise Daley (University of British Columbia), Anthony Dang (University of North Carolina Chapel Hill), Hong Dang (University of North Carolina Chapel Hill), Alicia De Paula (Ochsner Health System), Joan DeCelle-Germana (Schneider Children's Hospital), Allen Dozor (New York Medical College, Westchester Medical Center), Mitch Drumm (University of North Carolina Chapel Hill), Maynard Dyson (Cook Children's Med. Center), Julia Emerson (Seattle Children's Hospital, University of Washington), Mary J. Emond (University of Washington), Thomas Ferkol (St. Louis Children's Hospital, Washington University School of Medicine), Robert Fink (Children's Medical Center of Dayton), Cassandra Foster (Johns Hopkins University), Deborah Froh (University of Virginia), Li Gao (Johns Hopkins University), William Gershan (Children's Hospital of Wisconsin), Ronald L. Gibson (Seattle Children's Hospital, University of Washington), Elizabeth Godwin (University of North Carolina Chapel Hill), Magdalen Gondor (All Children's Hospital Cystic Fibrosis Center), Hector Gutierrez (University of Alabama at Birmingham), Nadia N. Hansel (Johns Hopkins University, Johns Hopkins University School of Public Health), Paul M. Hassoun (Johns Hopkins University), Peter Hiatt (Texas Children's Hospital), John E. Hokanson (University of Colorado), Michelle Howenstine (Indiana University, Riley Hospital for Children), Laura K. Hummer (Johns Hopkins University), Seema M. Jamal (University of Washington), Jamshed Kanga (University of Kentucky), Yoonhee Kim (National Human Genome Research Institute), Michael R. Knowles (University of North Carolina Chapel Hill), Michael Konstan (Rainbow Babies & Children's Hospital), Thomas Lahiri (Vermont Children's Hospital at Fletcher Allen Health Care), Nan Laird (Harvard School of Public Health), Christoph Lange (Harvard School of Public Health), Lin Lin (Harvard Medical School), Xihong Lin (Harvard School of Public Health), Tin L. Louie (University of Washington), David Lynch (National Jewish Health), Barry Make (National Jewish Health), Thomas R. Martin (University of Washington, VA Puget Sound Medical Center), Steve C. Mathai (Johns Hopkins University), Rasika A. Mathias (Johns Hopkins University), John McNamara (Children's Hospitals and Clinics of Minnesota), Sharon McNamara (Seattle Children's Hospital), Deborah Meyers (Wake Forest University), Susan Millard (DeVos Children's Butterworth Hospital, Spectrum Health Systems), Peter Mogayzel (Johns Hopkins University), Richard Moss (Stanford University), Tanda Murray (Johns Hopkins University), Dennis Nielson (University of California at San Francisco), Blakeslee Noyes (Cardinal Glennon Children's Hospital), Wanda O'Neal (University of North Carolina Chapel Hill), David Orenstein (Children's Hospital of Pittsburgh), Brian O'Sullivan (University of Massachusetts Memorial Health Care), Rhonda Pace (University of North Carolina Chapel Hill), Peter Pare (St. Paul's Hospital), H. Worth Parker (Dartmouth-Hitchcock Medical Center, New Hampshire Cystic Fibrosis Center), Mary Ann Passero (Rhode Island Hospital), Elizabeth Perkett (Vanderbilt University), Adrienne Prestridge (Children's Memorial Hospital), Nicholas M. Rafaels (Johns Hopkins University), Bonnie Ramsey (Seattle Children's Hospital, University of Washington), Elizabeth Regan (National Jewish Health), Clement Ren (University of Rochester), George Retsch-Bogart (University of North Carolina Chapel Hill), Michael Rock (University of Wisconsin Hospital and Clinics), Antony Rosen (Johns Hopkins University), Margaret Rosenfeld (Seattle Children's Hospital, University of Washington), Ingo Ruczinski (Johns Hopkins University School of Public Health), Andrew Sanford (University of British Columbia), David Schaeffer (Nemours Children's Clinic), Cindy Sell (University of North Carolina Chapel Hill), Daniel Sheehan (Children's Hospital of Buffalo), Edwin K. Silverman (Brigham and Women's Hospital, Harvard Medical School), Don Sin (Children's Medical Center of Dayton), Terry Spencer (Elliot Health System), Jackie Stonebraker (University of North Carolina Chapel Hill), Holly K. Tabor (Seattle Children's Hospital, University of Washington), Laurie Varlotta (St. Christopher's Hospital for Children), Candelaria I. Vergara (Johns Hopkins University), Robert

Weiss, Fred Wigley (Johns Hopkins University), Robert A. Wise (Johns Hopkins University), Fred A. Wright (University of North Carolina Chapel Hill), Mark M. Wurfel (University of Washington), Robert Zanni (Monmouth Medical Center), Fei Zou (University of North Carolina Chapel Hill).

**SeattleGO:** Deborah A. Nickerson (University of Washington), Mark J. Rieder (University of Washington), Phil Green (University of Washington), Jay Shendure (University of Washington), Joshua M. Akey (University of Washington), Michael J. Bamshad (Seattle Children's Hospital, University of Washington), Carlos D. Bustamante (Stanford University School of Medicine), David R. Crosslin (University of Washington), Evan E. Eichler (University of Washington), P. Keolu Fox, Wenqing Fu (University of Washington), Adam Gordon (University of Washington), Simon Gravel (Stanford University School of Medicine), Gail P. Jarvik (University of Washington), Jill M. Johnsen (Puget Sound Blood Center, University of Washington), Mengyuan Kan (Baylor College of Medicine), Eimear E. Kenny (Stanford University School of Medicine), Jeffrey M. Kidd (Stanford University School of Medicine), Fremiet Lara-Garduno (Baylor College of Medicine), Suzanne M. Leal (Baylor College of Medicine), Dajiang J. Liu (Baylor College of Medicine), Sean McGee (University of Washington), Timothy D. O'Connor (University of Washington), Bryan Paeper (University of Washington), Peggy D. Robertson (University of Washington), Joshua D. Smith (University of Washington), Jeffrey C. Staples (University of Washington), Jacob A. Tennesen (University of Washington), Emily H. Turner (University of Washington), Gao Wang (Baylor College of Medicine), Qian Yi (University of Washington)

**WHISP:** Rebecca Jackson (Ohio State University), Kari North (University of North Carolina Chapel Hill) Ulrike Peters (Fred Hutchinson Cancer Research Center), Christopher S. Carlson (Fred Hutchinson Cancer Research Center, University of Washington), Garnet Anderson (Fred Hutchinson Cancer Research Center), Hoda Anton-Culver (University of California at Irvine), Themistocles L. Assimes (Stanford University School of Medicine), Paul L. Auer (Fred Hutchinson Cancer Research Center), Shirley Beresford (Fred Hutchinson Cancer Research Center), Chris Bizon (University of North Carolina Chapel Hill), Henry Black (Rush Medical Center), Robert Brunner (University of Nevada), Robert Brzyski (University of Texas Health Science Center San Antonio), Dale Burwen (National Heart, Lung, and Blood Institute WHI Project Office), Bette Caan (Kaiser Permanente Division of Research, Oakland, CA), Cara L. Carty (Fred Hutchinson Cancer Research Center), Rowan Chlebowski (Los Angeles Biomedical Research Institute), Steven Cummings (University of California at San Francisco), J. David Curb\* (University of Hawaii), Charles B. Eaton (Brown University, Memorial Hospital of Rhode Island), Leslie Ford (National Heart, Lung, and Blood Institute, National Heart, Lung, and Blood Institute WHI Project Office), Nora Franceschini (University of North Carolina Chapel Hill), Stephanie M. Fullerton (University of Washington), Margery Gass (University of Cincinnati), Nancy Geller (National Heart, Lung, and Blood Institute WHI Project Office), Gerardo Heiss (University of North Carolina Chapel Hill), Barbara V. Howard (Howard University, MedStar Research Institute), Li Hsu (Fred Hutchinson Cancer Research Center), Carolyn M. Hutter (Fred Hutchinson Cancer Research Center), John Ioannidis (Stanford University School of Medicine), Shuo Jiao (Fred Hutchinson Cancer Research Center), Karen C. Johnson (University of Tennessee Health Science Center), Charles Kooperberg (Fred Hutchinson Cancer Research Center), Lewis Kuller (University of Pittsburgh), Andrea LaCroix (Fred Hutchinson Cancer Research Center), Kamakshi Lakshminarayan (University of Minnesota), Dorothy Lane (State University of New York at Stony Brook), Ethan M. Lange (University of North Carolina Chapel Hill), Leslie A. Lange (University of North Carolina Chapel Hill), Norman Lasser (University of Medicine and Dentistry of New Jersey), Erin LeBlanc (Kaiser Permanente Center for Health Research, Portland, OR), Cora E. Lewis (University of Alabama at Birmingham), Kuo-Ping Li (University of North Carolina Chapel Hill), Marian Limacher (University of Florida), Dan-Yu Lin (University of North Carolina Chapel Hill), Benjamin A. Logsdon (Fred Hutchinson Cancer Research Center), Shari Ludlam (National Heart, Lung, and Blood Institute WHI Project Office), JoAnn E. Manson (Brigham and Women's Hospital, Harvard School of Public Health), Karen Margolis (University of Minnesota), Lisa Martin

(George Washington University Medical Center), Joan McGowan (National Heart, Lung, and Blood Institute WHI Project Office), Keri L. Monda (Amgen, Inc.), Jane Morley Kotchen (Medical College of Wisconsin), Lauren Nathan (University of California Los Angeles), Judith Ockene (Fallon Clinic, University of Massachusetts), Mary Jo O'Sullivan (University of Miami), Lawrence S. Phillips (Emory University), Ross L. Prentice (Fred Hutchinson Cancer Research Center), Alexander P. Reiner (Fred Hutchinson Cancer Research Center, University of Washington), John Robbins (University of California at Davis), Jennifer G. Robinson (University of Iowa), Jacques E. Rossouw (National Heart, Lung, and Blood Institute, National Heart, Lung, and Blood Institute WHI Project Office), Haleh Sangi-Haghpeykar (Baylor College of Medicine), Gloria E. Sarto (University of Wisconsin), Sally Shumaker (Wake Forest University), Michael S. Simon (Wayne State University), Marcia L. Stefanick (Stanford University School of Medicine), Evan Stein (Medical Research Labs), Hua Tang (Stanford University), Kira C. Taylor (University of Louisville), Cynthia A. Thomson (University of Arizona), Timothy A. Thornton (University of Washington), Linda Van Horn (Northwestern University), Mara Vitolins (Wake Forest University), Jean Wactawski-Wende (University of Buffalo), Robert Wallace (University of Iowa), Sylvia Wassertheil-Smoller (Boston University), Donglin Zeng (University of North Carolina Chapel Hill)

\*deceased

**NHLBI GO ESP Project Team:** Deborah Applebaum-Bowden (National Heart, Lung, and Blood Institute), Michael Feolo (National Center for Biotechnology Information), Weiniu Gan (National Heart, Lung, and Blood Institute), Dina N. Paltoo (National Heart, Lung, and Blood Institute), Jacques E. Rossouw (National Heart, Lung, and Blood Institute, National Heart, Lung, and Blood Institute WHI Project Office), Phyliss Sholinsky (National Heart, Lung, and Blood Institute), Anne Sturcke (National Center for Biotechnology Information)

**ESP Groups:** Anthropometry Project Team, Blood Count/Hematology Project Team, Blood Pressure Project Team, Data Flow Working Group, <sup>5</sup>Early MI Project Team, ELSI Working Group, Executive Committee, Family Study Project Team, Lipids Project Team, Lung Project Team, Personal Genomics Project Team, Phenotype and Harmonization Working Group, Population Genetics and Statistical Analysis Working Group, Publications and Presentations Working Group, Quantitative Analysis Ad Hoc Task Group, Sequencing and Genotyping Working Group, Steering Committee, Stroke Project Team, Structural Variation Working Group, Subclinical/Quantitative Project Team

**ESP Cohorts:** Acute Lung Injury (ALI), Atherosclerosis Risk in Communities (ARIC), Cardiovascular Health Study (CHS), Chronic Obstructive Pulmonary Disease (COPDGene), Coronary Artery Risk Development in Young Adults (CARDIA), Cystic Fibrosis (CF), Early Pseudomonas Infection Control (EPIC), Framingham Heart Study (FHS), Jackson Heart Study (JHS), Lung Health Study (LHS), Multi-Ethnic Study of Atherosclerosis (MESA), Pulmonary Arterial Hypertension (PAH), Severe Asthma Research Program (SARP), Women's Health Initiative (WHI)

## References

1. Homer N, Merriman B, Nelson SF. BFAST: an alignment tool for large scale genome resequencing. *PLoS One*. 2009;4:e7767.
2. Li H, Handsaker B, Wysoker A, Fennell T, Ruan J, Homer N, Marth G, Abecasis G, Durbin R, 1000 Genome Project Data Processing Subgroup. The Sequence Alignment/Map format and SAMtools. *Bioinformatics*. 2009;25:2078–9.
3. Wang K, Li M, Hakonarson H. ANNOVAR: functional annotation of genetic variants from high-throughput sequencing data. *Nucleic Acids Res*. 2010;38:e164.
4. Exome variant server, nhlbi go exome sequencing project (esp), Seattle, WA. Available from: url: [Http://evs.Gs.Washington.Edu/evs/](http://evs.gs.washington.edu/evs/)
5. Auer PL, Johnsen JM, Johnson AD, Logsdon BA, Lange LA, Nalls MA, Zhang G, Franceschini N, Fox K, Lange EM, Rich SS, O'Donnell CJ, Jackson RD, Wallace RB, Chen Z, Graubert TA, Wilson JG, Tang H, Lettre G, Reiner AP, Ganesh SK, Li Y. Imputation of exome sequence variants into population-based samples and blood-cell-trait-associated loci in African Americans: NHLBI GO Exome Sequencing Project. *Am J Hum Genet*. 2012;91:794–808.
6. Fu W, O'Connor TD, Jun G, Kang HM, Abecasis G, Leal SM, Gabriel S, Rieder MJ, Altshuler D, Shendure J, Nickerson DA, Bamshad MJ, NHLBI Exome Sequencing Project JM, Akey JM. Analysis of 6,515 exomes reveals the recent origin of most human protein-coding variants. *Nature*. 2013;493:216–20.
7. Grove ML, Yu B, Cochran BJ, Haritunians T, Bis JC, Taylor KD, Hansen M, Borecki IB, Cupples LA, Fornage M, Gudnason V, Harris TB, Kathiresan S, Kraaij R, Launer LJ, Levy D, Liu Y, Mosley T, Peloso GM, Psaty BM, Rich SS, Rivadeneira F, Siscovick DS, Smith A V, Uitterlinden A, van Duijn CM, Wilson JG, O'Donnell CJ, Rotter JJ, Boerwinkle E. Best practices and joint calling of the HumanExome BeadChip: the CHARGE Consortium. *PLoS One*. 2013;8:e68095.
8. Lumley T, Brody J, Dupuis J C LA. Available from: <http://stattech.wordpress.fofos.auckland.ac.nz/files/2012/11/skat-meta-paper.pdf>
9. Wu MC, Lee S, Cai T, Li Y, Boehnke M, Lin X. Rare-Variant Association Testing for Sequencing Data with the Sequence Kernel Association Test. *Am J Hum Genet*. 2011;89:82–93.
10. Stephens M, Smith NJ, Donnelly P. A new statistical method for haplotype reconstruction from population data. *Am J Hum Genet*. 2001;68:978–89.
11. Zeng D, Lin DY. Estimating haplotype-disease associations with pooled genotype data. *Genet Epidemiol*. 2005;28:70–82.
12. Lin DY, Zeng D, Millikan R. Maximum likelihood estimation of haplotype effects and haplotype-environment interactions in association studies. *Genet Epidemiol*. 2005;29:299–312.
13. Dhingra R, Pencina MJ, Wang TJ, Nam B-H, Benjamin EJ, Levy D, Larson MG, Kannel WB, D'Agostino RB, Vasan RS. Electrocardiographic QRS duration and the risk of congestive heart failure: the Framingham Heart Study. *Hypertens (Dallas, Tex 1979)*. 2006;47:861–7.
14. Li N, Csepe TA, Hansen BJ, Dobrzynski H, Higgins RSD, Kilic A, Mohler PJ, Janssen PML, Rosen MR, Biesiadecki BJ, Fedorov V V. Molecular Mapping of Sinoatrial Node HCN Channel Expression in the Human Heart. *Circ Arrhythmia Electrophysiol*. 2015;8:1219–1227.
15. Dimas AS, Deutsch S, Stranger BE, Montgomery SB, Borel C, Attar-Cohen H, Ingle C, Beazley C, Gutierrez Arcelus M, Sekowska M, Gagnebin M, Nisbett J, Deloukas P, Dermitzakis ET, Antonarakis SE. Common regulatory variation impacts gene expression in a cell type-dependent manner. *Science*. 2009;325:1246–50.
16. Montgomery SB, Sammeth M, Gutierrez-Arcelus M, Lach RP, Ingle C, Nisbett J, Guigo R, Dermitzakis ET. Transcriptome genetics using second generation sequencing in a Caucasian population. *Nature*. 2010;464:773–7.
17. Myers AJ, Gibbs JR, Webster JA, Rohrer K, Zhao A, Marlowe L, Kaleem M, Leung D, Bryden L, Nath P, Zismann VL, Joshipura K, Huentelman MJ, Hu-Lince D, Coon KD, Craig DW, Pearson J V, Holmans P, Heward CB, Reiman EM, Stephan D, Hardy J. A survey of genetic human cortical gene expression. *Nat*

- Genet.* 2007;39:1494–9.
18. Pickrell JK, Marioni JC, Pai AA, Degner JF, Engelhardt BE, Nkadori E, Veyrieras J-B, Stephens M, Gilad Y, Pritchard JK. Understanding mechanisms underlying human gene expression variation with RNA sequencing. *Nature.* 2010;464:768–72.
  19. Schadt EE, Molony C, Chudin E, Hao K, Yang X, Lum PY, Kasarskis A, Zhang B, Wang S, Suver C, Zhu J, Millstein J, Sieberts S, Lamb J, GuhaThakurta D, Derry J, Storey JD, Avila-Campillo I, Kruger MJ, Johnson JM, Rohl CA, van Nas A, Mehrabian M, Drake TA, Lusic AJ, Smith RC, Guengerich FP, Strom SC, Schuetz E, Rushmore TH, Ulrich R. Mapping the genetic architecture of gene expression in human liver. *PLoS Biol.* 2008;6:e107.
  20. Stranger BE, Nica AC, Forrest MS, Dimas A, Bird CP, Beazley C, Ingle CE, Dunning M, Flicek P, Koller D, Montgomery S, Tavaré S, Deloukas P, Dermitzakis ET. Population genomics of human gene expression. *Nat Genet.* 2007;39:1217–24.
  21. Veyrieras J-B, Kudaravalli S, Kim SY, Dermitzakis ET, Gilad Y, Stephens M, Pritchard JK. High-Resolution Mapping of Expression-QTLs Yields Insight into Human Gene Regulation. *PLoS Genet.* 2008;4:e1000214.
  22. Zeller T, Wild P, Szymczak S, Rotival M, Schillert A, Castagne R, Maouche S, Germain M, Lackner K, Rossmann H, Eleftheriadis M, Sinning CR, Schnabel RB, Lubos E, Mennerich D, Rust W, Perret C, Proust C, Nicaud V, Loscalzo J, Hübner N, Tregouet D, Münzel T, Ziegler A, Tiret L, Blankenberg S, Cambien F. Genetics and beyond--the transcriptome of human monocytes and disease susceptibility. *PLoS One.* 2010;5:e10693.
  23. Gibbs JR, van der Brug MP, Hernandez DG, Traynor BJ, Nalls MA, Lai S-L, Arepalli S, Dillman A, Rafferty IP, Troncoso J, Johnson R, Zielke HR, Ferrucci L, Longo DL, Cookson MR, Singleton AB. Abundant Quantitative Trait Loci Exist for DNA Methylation and Gene Expression in Human Brain. *PLoS Genet.* 2010;6:e1000952.
  24. Chambers JC, Zhao J, Terracciano CMN, Bezzina CR, Zhang W, Kaba R, Navaratnarajah M, Lotlikar A, Sehmi JS, Kooner MK, Deng G, Siedlecka U, Parasramka S, El-Hamamsy I, Wass MN, Dekker LRC, de Jong JSSG, Sternberg MJE, McKenna W, Severs NJ, de Silva R, Wilde AAM, Anand P, Yacoub M, Scott J, Elliott P, Wood JN, Kooner JS. Genetic variation in SCN10A influences cardiac conduction. *Nat Genet.* 2010;42:149–152.
  25. Yang T, Atack TC, Stroud DM, Zhang W, Hall L, Roden DM. Blocking Scn10a Channels in Heart Reduces Late Sodium Current and Is Antiarrhythmic. *Circ Res.* 2012;111:322–332.
  26. Sotoodehnia N, Isaacs A, de Bakker PIW, Dörr M, Newton-Cheh C, Nolte IM, van der Harst P, Müller M, Eijgelsheim M, Alonso A, Hicks AA, Padmanabhan S, Hayward C, Smith AV, Polasek O, Giovannone S, Fu J, Magnani JW, Marcianti KD, Pfeufer A, Gharib SA, Teumer A, Li M, Bis JC, Rivadeneira F, Aspelund T, Köttgen A, Johnson T, Rice K, Sie MPS, Wang YA, Klopp N, Fuchsberger C, Wild SH, Mateo Leach I, Estrada K, Völker U, Wright AF, Asselbergs FW, Qu J, Chakravarti A, Sinner MF, Kors JA, Petersmann A, Harris TB, Soliman EZ, Munroe PB, Psaty BM, Oostra BA, Cupples LA, Perz S, de Boer RA, Uitterlinden AG, Völzke H, Spector TD, Liu F-Y, Boerwinkle E, Dominiczak AF, Rotter JI, van Herpen G, Levy D, Wichmann H-E, van Gilst WH, Witteman JCM, Kroemer HK, Kao WHL, Heckbert SR, Meitinger T, Hofman A, Campbell H, Folsom AR, van Veldhuisen DJ, Schwienbacher C, O'Donnell CJ, Volpato CB, Caulfield MJ, Connell JM, Launer L, Lu X, Franke L, Fehrmann RSN, te Meerman G, Groen HJM, Weersma RK, van den Berg LH, Wijmenga C, Ophoff RA, Navis G, Rudan I, Snieder H, Wilson JF, Pramstaller PP, Siscovick DS, Wang TJ, Gudnason V, van Duijn CM, Felix SB, Fishman GI, et al. Common variants in 22 loci are associated with QRS duration and cardiac ventricular conduction. *Nat Genet.* 2010;42:1068–76.
  27. Stroud DM, Yang T, Bersell K, Kryshtal DO, Nagao S, Shaffer C, Short L, Hall L, Atack TC, Zhang W, Knollmann BC, Baudenbacher F, Roden DM. Contrasting Nav1.8 Activity in Scn10a-/- Ventricular Myocytes and the Intact Heart. *J Am Heart Assoc.* 2016;5: e002946.
  28. Facer P, Punjabi PP, Abrari A, Kaba RA, Severs NJ, Chambers J, Kooner JS, Anand P. Localisation of SCN10A gene product Na(v)1.8 and novel pain-related ion channels in human heart. *Int Heart J.*



- 2011;52:146–52.
29. Verkerk AO, Remme CA, Schumacher CA, Scicluna BP, Wolswinkel R, de Jonge B, Bezzina CR, Veldkamp MW. Functional Nav1.8 channels in intracardiac neurons: the link between SCN10A and cardiac electrophysiology. *Circ Res.* 2012;111:333–43.
  30. Chen X, Yu L, Shi S, Jiang H, Huang C, Desai M, Li Y, Barajas-Martinez H, Hu D. Neuronal Nav1.8 Channels as a Novel Therapeutic Target of Acute Atrial Fibrillation Prevention. *J Am Heart Assoc.* 2016;5:e004050.
