# Supplementary material
Source: PubMed Central journal article supplement (PMC6377236)
Supplement: NIHMS1008689-supplement-Table_2.pdf [file NIHMS1008689-supplement-Table_2.pdf]

| CHR           | POS (hg18) | POS (hg19) | MAF     | Type                   | REF |
|---------------|------------|------------|---------|------------------------|-----|
| Stop Gain     |            |            |         |                        |     |
| 3             | 38714167   | 38739163   | 0.00011 | stopgain               | G   |
| 3             | 38718595   | 38743591   | 0.00023 | stopgain               | G   |
| 3             | 38728717   | 38753713   | 0.00011 | stopgain               | C   |
| 3             | 38730509   | 38755505   | 0.00011 | stopgain               | G   |
| 3             | 38768935   | 38793931   | 0.00011 | stopgain               | G   |
| 3             | 38787821   | 38812817   | 0.00011 | stopgain               | G   |
| Splicing      |            |            |         |                        |     |
| 3             | 38730454   | 38755450   | 0.00226 | splicing;nonsynonymous | C   |
| 3             | 38773365   | 38798361   | 0.00011 | splicing;nonsynonymous | G   |
| 3             | 38787774   | 38812770   | 0.00011 | splicing;nonsynonymous | G   |
| 3             | 38787901   | 38812897   | 0.00045 | splicing;nonsynonymous | A   |
| 3             | 38718335   | 38743331   | 0.00011 | splicing;synonymous    | C   |
| 3             | 38805531   | 38830527   | 0.00011 | splicing;synonymous    | C   |
| Nonsynonymous |            |            |         |                        |     |
| 3             | 38713893   | 38738889   | 0.00011 | nonsynonymous          | T   |
| 3             | 38713928   | 38738924   | 0.00124 | nonsynonymous          | A   |
| 3             | 38714025   | 38739021   | 0.00011 | nonsynonymous          | A   |
| 3             | 38714058   | 38739054   | 0.00023 | nonsynonymous          | G   |
| 3             | 38714110   | 38739106   | 0.00124 | nonsynonymous          | G   |
| 3             | 38714121   | 38739117   | 0.00011 | nonsynonymous          | T   |
| 3             | 38714128   | 38739124   | 0.00011 | nonsynonymous          | G   |
| 3             | 38714134   | 38739130   | 0.00011 | nonsynonymous          | C   |
| 3             | 38714175   | 38739171   | 0.00034 | nonsynonymous          | C   |
| 3             | 38714236   | 38739232   | 0.00011 | nonsynonymous          | C   |
| 3             | 38714373   | 38739369   | 0.00011 | nonsynonymous          | T   |
| 3             | 38714421   | 38739417   | 0.00011 | nonsynonymous          | G   |
| 3             | 38714484   | 38739480   | 0.00011 | nonsynonymous          | A   |
| 3             | 38714515   | 38739511   | 0.00056 | nonsynonymous          | C   |
| 3             | 38714539   | 38739535   | 0.00011 | nonsynonymous          | T   |
| 3             | 38714626   | 38739622   | 0.01051 | nonsynonymous          | C   |
| 3             | 38714715   | 38739711   | 0.00034 | nonsynonymous          | A   |
| 3             | 38714837   | 38739833   | 0.00011 | nonsynonymous          | C   |
| 3             | 38714866   | 38739862   | 0.00034 | nonsynonymous          | C   |
| 3             | 38714884   | 38739880   | 0.00011 | nonsynonymous          | C   |
| 3             | 38714974   | 38739970   | 0.00011 | nonsynonymous          | C   |
| 3             | 38714977   | 38739973   | 0.00011 | nonsynonymous          | T   |
| 3             | 38714979   | 38739975   | 0.00011 | nonsynonymous          | C   |
| 3             | 38715040   | 38740036   | 0.00011 | nonsynonymous          | T   |
| 3             | 38718406   | 38743402   | 0.00011 | nonsynonymous          | C   |

|   |          |          |         |               |   |
|---|----------|----------|---------|---------------|---|
| 3 | 38718410 | 38743406 | 0.00034 | nonsynonymous | C |
| 3 | 38718423 | 38743419 | 0.00305 | nonsynonymous | C |
| 3 | 38718424 | 38743420 | 0.00011 | nonsynonymous | A |
| 3 | 38718511 | 38743507 | 0.00045 | nonsynonymous | T |
| 3 | 38718522 | 38743518 | 0.00034 | nonsynonymous | A |
| 3 | 38718553 | 38743549 | 0.00011 | nonsynonymous | T |
| 3 | 38726043 | 38751039 | 0.00011 | nonsynonymous | A |
| 3 | 38726046 | 38751042 | 0.00023 | nonsynonymous | A |
| 3 | 38726054 | 38751050 | 0.00023 | nonsynonymous | G |
| 3 | 38726089 | 38751085 | 0.00011 | nonsynonymous | C |
| 3 | 38726098 | 38751094 | 0.00011 | nonsynonymous | G |
| 3 | 38727343 | 38752339 | 0.00023 | nonsynonymous | C |
| 3 | 38728736 | 38753732 | 0.00429 | nonsynonymous | A |
| 3 | 38728765 | 38753761 | 0.00011 | nonsynonymous | T |
| 3 | 38728838 | 38753834 | 0.00011 | nonsynonymous | A |
| 3 | 38728861 | 38753857 | 0.00011 | nonsynonymous | A |
| 3 | 38730469 | 38755465 | 0.00011 | nonsynonymous | C |
| 3 | 38730482 | 38755478 | 0.00011 | nonsynonymous | G |
| 3 | 38730508 | 38755504 | 0.00011 | nonsynonymous | C |
| 3 | 38730553 | 38755549 | 0.00023 | nonsynonymous | G |
| 3 | 38730566 | 38755562 | 0.00011 | nonsynonymous | T |
| 3 | 38735155 | 38760151 | 0.00045 | nonsynonymous | A |
| 3 | 38735183 | 38760179 | 0.00011 | nonsynonymous | T |
| 3 | 38738778 | 38763774 | 0.00011 | nonsynonymous | A |
| 3 | 38738820 | 38763816 | 0.00011 | nonsynonymous | C |
| 3 | 38738843 | 38763839 | 0.00034 | nonsynonymous | C |
| 3 | 38738866 | 38763862 | 0.00011 | nonsynonymous | T |
| 3 | 38738889 | 38763885 | 0.00011 | nonsynonymous | G |
| 3 | 38740002 | 38764998 | 0.23569 | nonsynonymous | A |
| 3 | 38741679 | 38766675 | 0.41667 | nonsynonymous | A |
| 3 | 38741764 | 38766760 | 0.02433 | nonsynonymous | G |
| 3 | 38741787 | 38766783 | 0.00011 | nonsynonymous | T |
| 3 | 38743121 | 38768117 | 0.00011 | nonsynonymous | C |
| 3 | 38743178 | 38768174 | 0.00011 | nonsynonymous | A |
| 3 | 38743216 | 38768212 | 0.00113 | nonsynonymous | G |
| 3 | 38743282 | 38768278 | 0.00011 | nonsynonymous | C |
| 3 | 38743304 | 38768300 | 0.25200 | nonsynonymous | T |
| 3 | 38743372 | 38768368 | 0.00011 | nonsynonymous | G |
| 3 | 38743417 | 38768413 | 0.00011 | nonsynonymous | G |
| 3 | 38743442 | 38768438 | 0.00011 | nonsynonymous | G |
| 3 | 38743501 | 38768497 | 0.00011 | nonsynonymous | T |

|   |          |          |                       |   |
|---|----------|----------|-----------------------|---|
| 3 | 38745123 | 38770119 | 0.00011 nonsynonymous | C |
| 3 | 38745201 | 38770197 | 0.00011 nonsynonymous | C |
| 3 | 38745202 | 38770198 | 0.00147 nonsynonymous | T |
| 3 | 38745212 | 38770208 | 0.00023 nonsynonymous | G |
| 3 | 38745236 | 38770232 | 0.00045 nonsynonymous | C |
| 3 | 38745249 | 38770245 | 0.00034 nonsynonymous | C |
| 3 | 38745263 | 38770259 | 0.00011 nonsynonymous | C |
| 3 | 38745336 | 38770332 | 0.00011 nonsynonymous | C |
| 3 | 38756015 | 38781011 | 0.00023 nonsynonymous | G |
| 3 | 38756135 | 38781131 | 0.00011 nonsynonymous | A |
| 3 | 38756176 | 38781172 | 0.00011 nonsynonymous | G |
| 3 | 38758839 | 38783835 | 0.00011 nonsynonymous | C |
| 3 | 38758840 | 38783836 | 0.00011 nonsynonymous | C |
| 3 | 38758846 | 38783842 | 0.00011 nonsynonymous | C |
| 3 | 38758847 | 38783843 | 0.00011 nonsynonymous | A |
| 3 | 38758943 | 38783939 | 0.00023 nonsynonymous | A |
| 3 | 38759014 | 38784010 | 0.00011 nonsynonymous | C |
| 3 | 38766591 | 38791587 | 0.00011 nonsynonymous | C |
| 3 | 38766667 | 38791663 | 0.00034 nonsynonymous | C |
| 3 | 38768722 | 38793718 | 0.00011 nonsynonymous | C |
| 3 | 38768757 | 38793753 | 0.00011 nonsynonymous | G |
| 3 | 38768801 | 38793797 | 0.00045 nonsynonymous | T |
| 3 | 38768811 | 38793807 | 0.00011 nonsynonymous | G |
| 3 | 38768869 | 38793865 | 0.00011 nonsynonymous | G |
| 3 | 38768877 | 38793873 | 0.00011 nonsynonymous | T |
| 3 | 38768944 | 38793940 | 0.02673 nonsynonymous | A |
| 3 | 38768946 | 38793942 | 0.00011 nonsynonymous | C |
| 3 | 38768977 | 38793973 | 0.00011 nonsynonymous | G |
| 3 | 38768980 | 38793976 | 0.00023 nonsynonymous | G |
| 3 | 38772312 | 38797308 | 0.00011 nonsynonymous | G |
| 3 | 38772314 | 38797310 | 0.00045 nonsynonymous | G |
| 3 | 38772374 | 38797370 | 0.00045 nonsynonymous | T |
| 3 | 38772407 | 38797403 | 0.00011 nonsynonymous | T |
| 3 | 38773173 | 38798169 | 0.00011 nonsynonymous | T |
| 3 | 38773179 | 38798175 | 0.00011 nonsynonymous | T |
| 3 | 38773198 | 38798194 | 0.00011 nonsynonymous | C |
| 3 | 38773263 | 38798259 | 0.00011 nonsynonymous | G |
| 3 | 38773318 | 38798314 | 0.00034 nonsynonymous | T |
| 3 | 38773321 | 38798317 | 0.00158 nonsynonymous | C |
| 3 | 38773601 | 38798597 | 0.00011 nonsynonymous | T |
| 3 | 38773624 | 38798620 | 0.00011 nonsynonymous | T |

|   |          |          |                       |   |
|---|----------|----------|-----------------------|---|
| 3 | 38777221 | 38802217 | 0.00056 nonsynonymous | C |
| 3 | 38777717 | 38802713 | 0.00079 nonsynonymous | C |
| 3 | 38777763 | 38802759 | 0.00011 nonsynonymous | C |
| 3 | 38777797 | 38802793 | 0.00011 nonsynonymous | C |
| 3 | 38777846 | 38802842 | 0.00011 nonsynonymous | A |
| 3 | 38780009 | 38805005 | 0.00011 nonsynonymous | C |
| 3 | 38780065 | 38805061 | 0.00023 nonsynonymous | C |
| 3 | 38780073 | 38805069 | 0.01343 nonsynonymous | T |
| 3 | 38787786 | 38812782 | 0.00011 nonsynonymous | A |
| 3 | 38787811 | 38812807 | 0.00011 nonsynonymous | G |
| 3 | 38805475 | 38830471 | 0.00023 nonsynonymous | C |
| 3 | 38805515 | 38830511 | 0.00011 nonsynonymous | T |
| 3 | 38808560 | 38833556 | 0.00011 nonsynonymous | T |
| 3 | 38808611 | 38833607 | 0.00011 nonsynonymous | C |
| 3 | 38808626 | 38833622 | 0.00011 nonsynonymous | C |
| 3 | 38810274 | 38835270 | 0.00011 nonsynonymous | G |
| 3 | 38810405 | 38835401 | 0.00011 nonsynonymous | G |
| 3 | 38810435 | 38835431 | 0.00011 nonsynonymous | A |
| 3 | 38810436 | 38835432 | 0.00011 nonsynonymous | T |
| 3 | 38810465 | 38835461 | 0.00271 nonsynonymous | C |
| 3 | 38810492 | 38835488 | 0.00011 nonsynonymous | A |

Synonymous

|   |          |          |                    |   |
|---|----------|----------|--------------------|---|
| 3 | 38714270 | 38739266 | 0.00011 synonymous | G |
| 3 | 38714279 | 38739275 | 0.00011 synonymous | T |
| 3 | 38714312 | 38739308 | 0.00011 synonymous | C |
| 3 | 38714345 | 38739341 | 0.00011 synonymous | C |
| 3 | 38714357 | 38739353 | 0.00068 synonymous | G |
| 3 | 38714420 | 38739416 | 0.00214 synonymous | C |
| 3 | 38714459 | 38739455 | 0.00011 synonymous | G |
| 3 | 38714498 | 38739494 | 0.03167 synonymous | G |
| 3 | 38714570 | 38739566 | 0.00011 synonymous | G |
| 3 | 38714738 | 38739734 | 0.00011 synonymous | C |
| 3 | 38714849 | 38739845 | 0.09452 synonymous | A |
| 3 | 38714885 | 38739881 | 0.00034 synonymous | G |
| 3 | 38714986 | 38739982 | 0.00011 synonymous | G |
| 3 | 38715005 | 38740001 | 0.01119 synonymous | C |
| 3 | 38718503 | 38743499 | 0.00011 synonymous | C |
| 3 | 38718575 | 38743571 | 0.00090 synonymous | G |
| 3 | 38726009 | 38751005 | 0.00011 synonymous | C |
| 3 | 38726042 | 38751038 | 0.00011 synonymous | A |
| 3 | 38730504 | 38755500 | 0.00034 synonymous | G |

|   |          |          |         |            |   |
|---|----------|----------|---------|------------|---|
| 3 | 38735250 | 38760246 | 0.00011 | synonymous | G |
| 3 | 38738867 | 38763863 | 0.26009 | synonymous | G |
| 3 | 38741705 | 38766701 | 0.13611 | synonymous | C |
| 3 | 38741765 | 38766761 | 0.00011 | synonymous | T |
| 3 | 38741798 | 38766794 | 0.00011 | synonymous | C |
| 3 | 38743191 | 38768187 | 0.00011 | synonymous | A |
| 3 | 38743215 | 38768211 | 0.00011 | synonymous | C |
| 3 | 38743251 | 38768247 | 0.25149 | synonymous | G |
| 3 | 38743254 | 38768250 | 0.00011 | synonymous | T |
| 3 | 38743338 | 38768334 | 0.04194 | synonymous | T |
| 3 | 38743374 | 38768370 | 0.00011 | synonymous | G |
| 3 | 38743479 | 38768475 | 0.00011 | synonymous | G |
| 3 | 38745052 | 38770048 | 0.00011 | synonymous | C |
| 3 | 38745124 | 38770120 | 0.00011 | synonymous | A |
| 3 | 38745270 | 38770266 | 0.00011 | synonymous | G |
| 3 | 38745304 | 38770300 | 0.00011 | synonymous | G |
| 3 | 38745310 | 38770306 | 0.00011 | synonymous | G |
| 3 | 38745382 | 38770378 | 0.00011 | synonymous | C |
| 3 | 38756055 | 38781051 | 0.00011 | synonymous | G |
| 3 | 38756061 | 38781057 | 0.00011 | synonymous | C |
| 3 | 38758875 | 38783871 | 0.00011 | synonymous | A |
| 3 | 38758984 | 38783980 | 0.00023 | synonymous | G |
| 3 | 38759002 | 38783998 | 0.00011 | synonymous | C |
| 3 | 38759020 | 38784016 | 0.00034 | synonymous | G |
| 3 | 38766632 | 38791628 | 0.00011 | synonymous | T |
| 3 | 38766674 | 38791670 | 0.00011 | synonymous | G |
| 3 | 38768756 | 38793752 | 0.00113 | synonymous | C |
| 3 | 38768807 | 38793803 | 0.00011 | synonymous | A |
| 3 | 38768993 | 38793989 | 0.24680 | synonymous | G |
| 3 | 38773175 | 38798171 | 0.24921 | synonymous | C |
| 3 | 38773358 | 38798354 | 0.00011 | synonymous | C |
| 3 | 38773636 | 38798632 | 0.00011 | synonymous | A |
| 3 | 38777223 | 38802219 | 0.00011 | synonymous | C |
| 3 | 38777784 | 38802780 | 0.00011 | synonymous | C |
| 3 | 38777862 | 38802858 | 0.00011 | synonymous | C |
| 3 | 38777876 | 38802872 | 0.00034 | synonymous | G |
| 3 | 38780043 | 38805039 | 0.00079 | synonymous | T |
| 3 | 38780055 | 38805051 | 0.00023 | synonymous | T |
| 3 | 38780061 | 38805057 | 0.00011 | synonymous | C |
| 3 | 38780079 | 38805075 | 0.00011 | synonymous | T |
| 3 | 38805456 | 38830452 | 0.00011 | synonymous | T |

|   |          |          |                    |   |
|---|----------|----------|--------------------|---|
| 3 | 38810272 | 38835268 | 0.00011 synonymous | G |
| 3 | 38810337 | 38835333 | 0.00011 synonymous | A |
| 3 | 38810344 | 38835340 | 0.00011 synonymous | C |
| 3 | 38810461 | 38835457 | 0.01070 synonymous | G |

| ALT | rs         | Polyphen2 | SIFT | PlyloP | LRT | Ancestral_allele |
|-----|------------|-----------|------|--------|-----|------------------|
| A   |            | NA        | NA   | C      | N   | G                |
| A   |            | NA        | NA   | C      | D   | G                |
| T   |            | NA        | NA   | C      | D   | C                |
| A   |            | NA        | NA   | C      | D   | G                |
| A   |            | NA        | NA   | C      | N   | G                |
| C   |            | NA        | NA   | C      | D   | G                |
| T   |            | D         | D    | C      | D   | C                |
| T   |            | D         | D    | C      | D   | G                |
| A   |            | D         | D    | C      | N   | G                |
| C   |            | D         | D    | N      | D   | A                |
| T   |            |           |      |        |     |                  |
| T   |            |           |      |        |     |                  |
| C   |            | B         | T    | C      | N   | T                |
| T   |            | D         | T    | N      | D   | A                |
| T   |            | B         | T    | C      | N   | A                |
| A   |            | B         | D    | N      | N   | G                |
| A   |            | D         | D    | C      | D   | G                |
| G   |            | D         | D    | C      | D   | T                |
| A   |            | D         | D    | C      | D   | G                |
| T   |            | P         | D    | C      | D   | C                |
| T   |            | D         | T    | C      | U   | C                |
| T   |            | D         | D    | C      | D   | C                |
| C   |            | D         | D    | C      | D   | T                |
| A   |            | D         | D    | C      | D   | G                |
| G   |            | D         | D    | C      | N   | A                |
| T   |            | D         | D    | C      | D   | C                |
| G   |            | D         | D    | C      | D   | T                |
| T   | rs77804526 | B         | T    | N      | N   | C                |
| G   |            | D         | D    | C      | D   | A                |
| T   |            | D         | D    | C      | D   | C                |
| A   |            | D         | D    | C      | D   | C                |
| T   |            | D         | D    | C      | D   | C                |
| T   |            | P         | D    | C      | D   | C                |
| A   |            | P         | D    | C      | D   | T                |
| T   |            | D         | D    | C      | D   | C                |
| C   |            | D         | T    | N      | N   | T                |
| T   |            | D         | D    | C      | D   | C                |

|   |            |   |   |   |    |   |
|---|------------|---|---|---|----|---|
| T |            | B | T | C | N  | C |
| T |            | D | D | C | D  | C |
| G |            | D | D | C | D  | A |
| A |            | D | D | C | D  | T |
| T |            | D | T | N | D  | A |
| C |            | B | D | C | D  | T |
| G |            | D | D | C | D  | A |
| G |            | D | D | C | D  | A |
| C |            | B | D | C | N  | G |
| T |            | D | D | C | D  | C |
| T |            | D | D | C | D  | G |
| T | rs11711062 | D | T | C | N  | C |
| A |            | B | T | N | N  | A |
| G |            | D | D | N | NA | T |
| C |            | D | D | C | D  | A |
| T |            | D | D | C | D  | A |
| A |            | D | D | N | D  | C |
| T |            | D | D | C | D  | G |
| A |            | D | D | C | U  | C |
| A |            | P | T | N | N  | T |
| G |            | D | D | C | D  | A |
| C |            | D | T | C | D  | T |
| G |            | D | D | C | D  | A |
| T |            | B | T | C | D  | C |
| G |            | D | D | C | D  | C |
| G |            | B | T | C | U  | T |
| A |            | D | T | C | D  | G |
| G | rs12632942 | B | T | N | N  | G |
| G | rs6795970  | B | T | N | N  | G |
| T | rs73062575 | B | T | N | N  | G |
| A |            | B | T | N | N  | T |
| T |            | B | T | C | N  | C |
| C |            | D | D | C | N  | A |
| A |            | D | D | C | N  | G |
| T |            | B | T | C | N  | C |
| C | rs57326399 | B | T | N | N  | t |
| A |            | B | T | N | N  | G |
| T |            | P | D | N | N  | G |
| A |            | D | D | C | D  | G |
| G |            | D | D | C | D  | T |



|   |            |   |   |   |    |   |
|---|------------|---|---|---|----|---|
| T |            | D | D | C | D  | C |
| A |            | B | D | N | N  | C |
| G |            | B | T | N | N  | T |
| A |            | B | T | N | N  | G |
| T |            | P | T | N | N  | C |
| A |            | D | D | C | D  | C |
| A |            | D | D | C | D  | C |
| T |            | D | D | C | D  | C |
| C |            | D | D | C | D  | G |
| G |            | B | T | C | N  | A |
| C |            | P | D | C | D  | G |
| G |            | P | D | C | D  | C |
| T |            | D | D | C | D  | C |
| T |            | D | D | C | D  | C |
| G |            | D | D | C | D  | A |
| T |            | B | T | N | N  | A |
| A |            | P | T | N | D  | C |
| T | rs35332705 | D | D | C | D  | C |
| T |            | B | T | C | N  | C |
| A |            | B | T | N | N  | C |
| A |            | P | T | N | N  | g |
| A |            | B | T | C | N  | T |
| A |            | D | D | C | N  | G |
| C |            | P | T | C | N  | G |
| G | rs7630989  | B | T | N | N  | T |
| T |            | B | D | C | N  | A |
| A |            | D | D | N | N  | C |
| A |            | D | D | C | N  | G |
| A |            | P | D | C | NA | G |
| A |            | B | D | N | NA | G |
| C |            | P | D | C | N  | T |
| C |            | B | T | N | N  | T |
| C |            | D | T | C | D  | T |
| T |            | B | T | N | N  | T |
| A |            | D | D | C | D  | C |
| C |            | D | T | C | D  | G |
| T |            | P | T | C | D  | T |
| C |            | D | D | C | D  | C |
| A |            | D | D | N | D  | T |

|   |            |   |   |   |   |   |
|---|------------|---|---|---|---|---|
| T |            | B | T | N | U | C |
| T |            | B | T | N | N | C |
| A |            | D | D | N | D | C |
| A |            | D | D | C | D | C |
| T |            | D | D | C | D | A |
| T |            | D | D | C | D | C |
| T |            | D | D | C | N | C |
| C | rs74717885 | B | T | N | N | T |
| G |            | D | D | C | D | A |
| A |            | D | D | C | D | G |
| T |            | B | T | N | N | C |
| C |            | D | T | C | D | T |
| C |            | P | T | C | D | T |
| T |            | B | T | C | N | C |
| T |            | D | D | C | D | C |
| C |            | D | T | C | D | G |
| C |            | B | T | C | N | G |
| G |            | B | D | C | N | A |
| A |            | B | T | C | D | T |
| A |            | D | D | N | D | C |
| G |            | B | T | N | N | A |

|   |             |
|---|-------------|
| A | rs111535651 |
| C |             |
| T |             |
| A |             |
| A |             |
| T |             |
| A | rs116353929 |
| A |             |
| T |             |
| G | rs6599242   |
| A |             |
| A |             |
| T | rs78425180  |
| T |             |
| A |             |
| T |             |
| G |             |
| T |             |

A  
C  
T  
C  
T  
T  
T  
A  
C  
C  
A  
A  
A  
G  
A  
A  
A  
T  
T  
T  
G  
A  
T  
A  
C  
A  
T  
C  
A  
T  
T  
G  
T  
T  
T  
A  
G  
C  
T  
C  
C

rs6771157

rs6791171

rs59468016

rs7374804

rs7617919

rs62244070

A  
G  
T  
A

rs34314583

AA REF      AA ALT

Q            X  
Q            X  
W            X  
R            X  
R            X  
Y            X

R            Q  
T            N  
A            V  
Y            D

Q            R  
S            R  
F            Y  
A            V  
R            C  
Y            S  
R            W  
A            T  
R            Q  
E            K  
N            S  
S            L  
F            S  
E            K  
N            H  
V            I  
L            P  
M            I  
V            F  
G            R  
G            S  
I            F  
R            Q  
I            V  
A            T

M  
C  
C  
M  
M  
I  
F  
I  
I  
E  
P  
R  
S  
N  
F  
F  
R  
R  
R  
A  
I  
I  
N  
M  
R  
W  
K  
P  
L  
V  
P  
E  
E  
S  
P  
G  
I  
P  
T  
R  
D

I  
Y  
R  
L  
K  
V  
S  
T  
M  
K  
T  
Q  
T  
I  
L  
C  
Q  
W  
Q  
V  
L  
T  
D  
T  
H  
C  
Q  
L  
P  
A  
T  
V  
K  
A  
L  
E  
V  
L  
N  
W  
A

E  
D  
E  
A  
R  
G  
G  
G  
R  
F  
T  
E  
M  
M  
M  
M  
E  
S  
G  
D  
P  
Q  
P  
R  
E  
S  
R  
R  
R  
R  
P  
E  
N  
Q  
K  
A  
A  
I  
V  
N  
K

K  
Y  
D  
V  
H  
W  
V  
R  
G  
L  
S  
Q  
I  
I  
T  
K  
D  
N  
R  
N  
L  
H  
L  
W  
G  
P  
Q  
W  
C  
C  
L  
G  
S  
R  
R  
T  
V  
V  
I  
S  
N

R  
E  
K  
S  
S  
V  
R  
I  
V  
P  
R  
I  
K  
R  
R  
P  
T  
I  
I  
R  
I

Q  
K  
N  
I  
T  
M  
H  
M  
A  
S  
Q  
V  
R  
Q  
Q  
A  
R  
T  
L  
L  
T
